1

2

3 **Range Overlap Drives Chromosome Inversion Fixation in Passerine Birds**

4

5 Daniel M. Hooper<sup>1,2</sup>

6

7 <sup>1</sup>Committee on Evolutionary Biology, University of Chicago, Chicago, Illinois 60637

8 <sup>2</sup> E-mail: [dhooper1@uchicago.edu](mailto:dhooper1@uchicago.edu)

9

10

11 Friday, May 6, 2016

12

13

14 Short title: Chromosomal inversions in passerine birds

15 Chromosome inversions evolve frequently but the reasons why remain largely enigmatic. I  
16 used cytological descriptions of 410 species of passerine birds (order Passeriformes) to  
17 identify pericentric inversion differences between species. Using a new fossil-calibrated  
18 phylogeny I examine the phylogenetic, demographic, and genomic context in which these  
19 inversions have evolved. The number of inversion differences between closely related  
20 species was highly variable yet consistently predicted by a single factor: whether the  
21 ranges of species overlapped. This observation holds even when the analysis is restricted  
22 to sympatric sister pairs known to hybridize, and which have divergence times estimated  
23 similar to allopatric pairs. Inversions were significantly more likely to have fixed on a sex  
24 chromosome than an autosome yet variable mutagenic input alone (by chromosome size,  
25 map length, GC content, or repeat density) cannot explain the differences between  
26 chromosomes in the number of inversions fixed. Together, these results support a model in  
27 which inversions in passerines are adaptive and spread by selection when gene flow occurs  
28 before reproductive isolation is complete.

29

30

31 **KEY WORDS:** Birds, chromosome inversion, gene flow, hybridization, passerines,  
32 speciation

## 33 **Introduction**

34 Speciation occurs not just from the accumulation of molecular changes in DNA composition  
35 but also with physical rearrangements to the structure of diverging genomes. Chromosome  
36 inversions, one common type of chromosomal rearrangement, are often observed as fixed  
37 differences between species and as polymorphisms segregating within species [1,2].

38 Chromosome inversions are thought to impact sex chromosome evolution [3–5], supergene  
39 formation [6–9], local adaptation [10–13], and reproductive isolation [14–18]. Despite  
40 their potential evolutionary importance, the widespread presence of inversions is puzzling,  
41 as new rearrangements may be initially disfavored due to structural underdominance in  
42 heterokaryotypes, if crossing over within the inverted region during meiosis results in the  
43 production of aneuploid gametes [1,2,19]. Reconciling the pervasiveness of chromosome  
44 inversions both between and within species with possible selective disadvantages that a  
45 new inversion faces remains an unresolved problem.

46       Traditional models of inversion fixation rely upon genetic drift acting within highly  
47 structured populations to lift an inversion above 50% frequency in a deme, after which  
48 selection favors its spread [20–24]. This model predicts that inversion fixation should be  
49 independent of population size [20]. Hooper and Price [25] tested this in the Estrildid  
50 finches (family Estrildidae) and rejected it, based on the strong positive relationship  
51 observed between the rate of inversion fixation and range size. Other models of inversion  
52 fixation have focused on selection, in which drift plays no part. An inversion may be  
53 adaptive and spread (1) if its breakpoints favorably alter gene expression [26,27] or (2) by  
54 meiotic drive if it happens to link alleles that together alter segregation distortion [28,29].  
55 Alternatively, recent models emphasize the contextual selective advantage of an inversion

56 if it suppresses recombination [30–32]. In these scenarios, an inversion will spread when  
57 natural selection favors the maintenance of linkage disequilibrium between sets of alleles  
58 that are locally adapted to (3A) the habitat or (3B) the genetic background of a population  
59 that would otherwise be broken up by recombination.

60         The alternative selection models make different predictions that can be tested with  
61 comparative analyses. All adaptive models depend on mutational input, which should scale  
62 with population size, but selection pressures arising from breakpoint effects and meiotic  
63 drive models should be particularly strongly associated with mutational input. This is  
64 because selection pressures are less dependent on environmental context and mutations  
65 that produce favorable effects are likely to be rare. Hence, these models predict a strong  
66 scaling with population size. On the other hand, in recombination suppression models gene  
67 flow plays a central role, as it generates the selective advantage for a new inversion. In one  
68 case (hypothesis 3A, above), ecological differences are essential if local adaptation is to  
69 create a selective advantage for an inversion [31]. Ecological differences can be assessed by  
70 measuring characteristics such as body mass, feeding guild, habitat associations, etc. Gene  
71 flow in the form of hybridization between incompletely reproductively isolated forms is  
72 required if inversions are to increase in response to genetic incompatibilities (hypothesis  
73 3B). This latter model therefore predicts partially reproductively isolated forms should  
74 have had the potential to interbreed.

75         In Estrildidae, a previous analysis showed that both range size and range overlap  
76 were positively associated with the rate of inversion fixation [25]. However, range size and  
77 range overlap were themselves correlated, and it was difficult to disentangle their  
78 contributions, given the sample size (N = 32 species). The range size of a species may be

79 considered an estimate of population size, predicted to be a strong correlate in the  
80 breakpoint and meiotic drive models. Range overlap between closely related species  
81 indicates the potential for hybridization, predicted to be essential in genetic incompatibility  
82 models. The distinction between the two range effects is important as it suggests  
83 alternative adaptive roles for chromosome inversions: range overlap implies that inversion  
84 evolution may be intimately linked to the speciation process through interspecific  
85 interactions (3B), but without range overlap this is not possible.

86         The Passeriformes are just one of 39 extant orders of birds yet comprise over half of  
87 all avian biodiversity with the ~6000 species found in nearly every terrestrial habitat on  
88 the planet [33]. The rapid rate of speciation and geographic expansion in passerines is  
89 coupled with extensive eco-morphological diversification: body size varies >350-fold  
90 between the smallest and largest species (4.2 g to 1,500 g) while variation in beak shape  
91 and behavior has produced a wide spectrum of feeding morphologies (nectarivores,  
92 granivores, insectivores, frugivores, etc. [33,34]). In contrast to the wealth of eco-  
93 morphological diversity in passerines, the gross structure of the passerine genome does  
94 not vary greatly, with diploid chromosome number (2N) falling between 76-80 for 77% of  
95 species (Table S1; reviewed in [35]). Although inter-chromosomal rearrangements like  
96 chromosome fusions, fissions, and translocations may be generally rare in birds, inversions  
97 are far more common [25,35–38]. Cytological evidence for the frequent occurrence of  
98 inversions in birds is corroborated by recent genomic studies that observe hundreds of  
99 inversion-derived rearrangements between species [39–45].

100         In order to evaluate support for alternative models of inversion fixation, I here use  
101 the phylogenetic and genomic distribution of large pericentric inversions (i.e. those

102 encompassing the centromere) identified from the cytological literature of 410 species of  
103 passerine birds. To this end, I build a fossil-calibrated phylogeny of those passerines with  
104 karyotype data and map pericentric inversion fixation on the 9 largest autosomes and both  
105 sex chromosomes (S1-4 Tables). I compare the extent of inversion differentiation, across  
106 80 passerine clades and 47 sister species pairs, with differences between species in range  
107 size and their patterns of range overlap (S5-7 Tables). I evaluate the importance of raw  
108 mutagenic input on the genomic distribution of inversions by assessing how the number of  
109 inversions on a chromosome is associated with its size, map length, repeat density, and GC  
110 content or whether it was an autosome or sex chromosome (S8-9 Tables). By examining  
111 the drivers of chromosome inversion evolution in a group as species rich and ecologically  
112 diverse as the passerines, I aim to illuminate both the frequency with which inversions  
113 occur in birds and the implications for chromosome inversions and speciation with gene  
114 flow, broadly.

115

## 116 **Results**

### 117 **Phylogenetic Signal of Chromosome Inversion Evolution in Passerines**

118 The time-calibrated phylogeny for the 410 karyotyped passerine species in this study is  
119 shown in Figure 1 with family memberships labeled (see also S1-2 Figs.). The topology is  
120 congruent both between and within families to previously published studies in  
121 Passeriformes (S5 Table). Divergence time estimates between families are consistent again  
122 with recent phylogenomic studies of crown *Aves* that utilized partially overlapping fossil  
123 sets and similar calibration methods [46,47].

124

---

125 **Fig 1. Pericentric inversion fixation rate variation across Passeriformes.** Passerine  
126 families included in this study are shown on the left: numbers within parentheses refer to  
127 the number of karyotyped species and number of pericentric inversions within each family,  
128 respectively. Families are ordered clockwise by phylogenetic position in the tree. The time-  
129 dated phylogeny for the 410 karyotyped species used in this study is shown on the right.  
130 Branches are color-coded according to the inferred rate of pericentric inversion fixation  
131 using the R package ggtree [48] with rates partitioned according to the Jenks natural  
132 breaks method where variance within bins is minimized, while variance between bins is  
133 maximized [49].

134

---

135 The rate of inversion fixation averaged across all 410 passerine species was one  
136 inversion every 5.3 million years of evolution along a branch (4269My total branch  
137 length/808 inferred inversions). Inversion fixation rate varied greatly across lineages (Fig.  
138 1). Rates ranged from no inversions fixed over 23.7My on the lineage leading to the  
139 common iora (*Aegithina tiphia*) to an inversion on the 6<sup>th</sup> largest autosome that separated  
140 the pied and black-eared wheatear (*Oenanthe pleschanka* and *O. melanoleuca*) with a  
141 divergence time of ~0.2Ma. Explaining the underlying evolutionary basis of this rate  
142 variation was the guiding motivation of this study.

143

#### 144 Inversion Differentiation Across 80 Passerine Clades

145 Analysis of inversion fixation using 80 independent passerine clades strongly suggests that  
146 time and range overlap – rather than range size – are the best predictors of pericentric  
147 inversion evolution in Passeriformes. The best model to predict the number of inversions

148 fixed in each clade contained two variables (branch length and range overlap; S9 Table).  
149 The two top models had similar AICc scores and model weights ( $\Delta AICc < 2$ ; S9 Table) so I  
150 used model averaging to combine them into a final model (Table 1). This averaged model  
151 included median clade range size as an additional parameter, however only branch length  
152 ( $p < 0.0001$ ) and range overlap were significant ( $p < 0.0001$ ; Table 1). Older clades with  
153 more sympatric species have significantly more inversions than younger and more  
154 allopatric clades (Fig. 2; Table 1) and neither range size nor division of clades by ecological  
155 niche contributed (S9 Table) Results were consistent regardless of whether I used a more  
156 relaxed  $\Delta AICc$  cutoff to model averaging (i.e. averaging all models with  $\Delta AICc < 4$ ) or an  
157 alternative minimum range overlap cutoff values (10% or 15% pairwise range overlap) to  
158 calculate the extent of range overlap in each clade.

159 \_\_\_\_\_  
160 **Table 1. Final averaged model for clade level analysis.** Phylogenetic least squares  
161 model to predict the number of pericentric inversions fixed in 80 passerine clades.  
162 Approximate 95% confidence intervals were calculated as the parameter estimate  $\pm 2 \times$   
163 standard error. P values for parameter significance were calculated by MuMIn in R [50]  
164 model averaging the top two models with  $\Delta AICc < 2$ .

| Parameter     | Estimate | Standard Error | Approximate 95% confidence interval | Z    | P                     |
|---------------|----------|----------------|-------------------------------------|------|-----------------------|
| (Intercept)   | 0.14     | 0.76           | -1.37 to 1.66                       | 0.19 | 0.87                  |
| Branch length | 0.74     | 0.13           | 0.48 to 1.00                        | 5.69 | $< 2 \times 10^{-16}$ |
| Range overlap | 1.88     | 0.47           | 0.94 to 2.84                        | 3.93 | $8.5 \times 10^{-5}$  |
| Range size    | 0.18     | 0.10           | -0.02 to 0.38                       | 1.77 | 0.08                  |

165 \_\_\_\_\_  
166 **Fig 2. Pericentric inversion fixation rate variation across 80 passerine clades.**  
167 Fixation rate is shown against the proportion of sympatric species pairs (left) and median



168 clade range size (right). Fixation rate calculated as the total number of inversions on all  
169 chromosomes divided by the total clade branch length summed across each chromosome.  
170 Each clade is represented by a circle and shaded according to the proportion of total  
171 species with karyotype data.

---

173

## 174 Inversion Differentiation Across 47 Sister Species Pairs

175 As a complement to the clade level analysis, I considered sister pairs, as clearly  
176 independent points. Sympatric sister species were significantly more likely to differ by an  
177 inversion than allopatric sisters (two-tailed  $t$ -test:  $t_{45} = 3.1$ ,  $p = 0.003$ ; Fig. 3A). The best  
178 model to explain the number of inversion differences between sister species contained a  
179 single parameter: whether sister species overlapped in range or not (Fig. 3B; S9 Table). The  
180 two top models had similar AICc scores and model weights ( $\Delta\text{AICc} < 2$ ; S9 Table) so I used  
181 model averaging to combine them into a final model (Table 2). While this averaged model  
182 included sister pair age as an additional parameter, only range overlap was found to be  
183 significant ( $p = 0.01$ ; Tables 2, 3). The 12 sister species known to hybridize in nature were  
184 more likely to be differentiated by an inversion than their allopatric counterparts (two-  
185 tailed  $t$ -test:  $t_{21} = 3.0$ ,  $p = 0.007$ ; Fig. 3A) despite not being genetically more divergent ( $t_{21} =$   
186  $0.28$ ,  $p > 0.1$ ; S6 Table).

---

188 **Table 2. Final averaged model for sister species analysis.** Generalized linear model  
189 with Poisson errors to predict the number of pericentric inversion differences between 47  
190 sister species pairs. Approximate 95% confidence intervals were calculated as the

191 parameter estimate  $\pm 2 \times$  standard error. P values for parameter significance were  
 192 calculated by MuMIn in R [50] after model averaging the top two models with  $\Delta AICc < 2$ .

| Parameter           | Estimate | Standard Error | Approximate 95% confidence interval | Z    | P     |
|---------------------|----------|----------------|-------------------------------------|------|-------|
| (Intercept)         | -0.54    | 0.23           | -1.0 to -0.08                       | 2.31 | 0.021 |
| Range overlap (Yes) | 0.67     | 0.25           | 0.17 to 1.17                        | 2.57 | 0.01  |
| Sister age          | 0.08     | 0.10           | -0.12 to 0.28                       | 0.77 | 0.44  |

193  
 194 **Table 3. Pericentric inversion differentiation between sister species.** Species pairs  
 195 binned by range overlap (Allopatric versus Sympatric) and inversion presence (no  
 196 inversions or some inversions). The average value and range is shown for Age, Range Size,  
 197 and number of Inversion Differences. Both fixed inversion differences and inversion  
 198 polymorphisms observed in one sister but not the other were included. Full data in S5  
 199 Table.

| Sister Species Distribution | Inversion Presence | Sister Pairs (N) | Age (Ma)         | Range Size ( $10^6$ km <sup>2</sup> ) | Inversion Differences |
|-----------------------------|--------------------|------------------|------------------|---------------------------------------|-----------------------|
| Allopatric                  | None               | 6                | 2.4 (0.9 – 5.0)  | 2.5 (0.2 – 5.3)                       | 0                     |
|                             | Some               | 3                | 2.8 (1.0 – 6.9)  | 4.0 (1.1 – 5.6)                       | 2.3 (1 – 4)           |
| Sympatric                   | None               | 7                | 4.25 (2.3 – 7.5) | 6.8 (2.2 – 10.9)                      | 0                     |
|                             | Some               | 31               | 3.7 (0.2 – 9.3)  | 7.9 (0.8 – 35.2)                      | 3.2 (1 – 12)          |

200  
 201 **Fig 3. Pericentric inversion differentiation between sister species.** Sister species  
 202 sorted into allopatric pairs, sympatric pairs (any amount of range overlap), and the subset  
 203 of sympatric sister pairs that are known to hybridize [51]. Variation between sister species  
 204 groups in A) the proportion of sister pairs with and without inversion differences (none or  
 205 some, respectively) and B) the number of inversion differences between sister species.

206

---

207 Species triplets consist of a sister pair and an outgroup species, where the outgroup  
208 overlaps one of the two sisters but not the other. Comparisons of differences between the  
209 outgroup and each sister therefore test for a role of sympatry, with time completely  
210 factored out [52-54]. Figure 4 shows a representative example where the extent of  
211 inversion differentiation is conditional upon geographic overlap with the outgroup. Results  
212 from triplet comparison confirmed the importance of range overlap (S7 Table). A  
213 conservative triplet set, where the outgroup shows no overlap with one of the sisters, has  
214 little power (N = 5) but the three triplets that show differences in the extent of inversion  
215 accumulation all find that the sister species whose range overlapped with the outgroup had  
216 accumulated more inversion differences. In a relaxed triplet set, in which some degree of  
217 range overlap was allowed between the outgroup or sisters (N = 19), 7 triplets showed no  
218 difference in inversion differentiation. However, ten triplets showed more inversions in the  
219 sister species that overlaps with the outgroup and 2 triplets the opposite pattern (two-  
220 tailed sign rank test,  $p = 0.039$ ). Differences in range size between sisters did not predict  
221 the number of inversion differences (regression of contrasts, forced through the origin,  $p >$   
222 0.1).

223

---

224 **Fig 4. Triplet analysis of pericentric inversion evolution across greenfinches in the**  
225 **genus *Chloris*.** The phylogenetic history of pericentric inversion fixation in *Chloris* is  
226 shown on the left, with inversions (black ovals) on the branches they are inferred to have  
227 fixed. The geographic distribution and likeness of each species is shown on the right. The  
228 European greenfinch *Chloris chloris* (green, A) and black-headed greenfinch *C. ambigua*

229 (red, B) are allopatric sister species. The grey-capped greenfinch *C. sinica* (blue, Out) is the  
230 outgroup geographically isolated from *C. chloris* but in geographic contact with *C. ambigua*.  
231 While 5 inversions have evolved to differentiate *C. ambigua* from *C. sinica*, only two  
232 inversions have evolved that differentiate *C. chloris* from *C. sinica* – neither of which  
233 occurred following the divergence between *C. ambigua* and *C. chloris*. \*I have treated the  
234 three members of a black-headed greenfinch species complex (*C. ambigua*, *C. monguilloti*,  
235 and *C. spinoides*) as a single species *C. ambigua* here based on the lack of any observed  
236 premating isolation where their ranges overlap [51].

237

---

238

### 239 Genomic Distribution of Chromosome Inversions

240 The fastest rearranging autosomal chromosome evolved 4× faster than the slowest (Tables  
241 4, S8). The three top models to explain the variation in inversion fixation rate between the  
242 autosomes had nearly equivocal AICc scores and model weights ( $\Delta\text{AICc} < 2$ ; S10 Table). I  
243 used model averaging to combine them into a final model that included only chromosome  
244 GC content and repeat density (S10 Table). Of these, only repeat density was found to be  
245 significant (z value = 2.3,  $p = 0.02$ ; S10 Table). The significance of the observed association  
246 was not robust to model averaging the six top models with  $\Delta\text{AICc} < 4$ , suggesting only a  
247 weak effect of repeat density (S10 Table). Inclusion of the Z chromosome in these analyses  
248 further reduced the fit of any mutagenic model to explain variation in inversion fixation  
249 rate between chromosomes.

250

---

251 **Table 4. Genomic distribution of pericentric inversions.** Autosomes are listed in order  
 252 of descending size with their presumed homology to the collared flycatcher (*Ficedula*  
 253 *albicollis*) genome given in parentheses. Values for chromosome size and map length come  
 254 from the collared flycatcher genome [44] while GC content and repeat density come from  
 255 the zebra finch (*Taeniopygia guttata*) genome [55,56]. Variance in branch lengths by  
 256 chromosome reflects species with missing data.

| Chromosome | Size (Mb) | Map Length (cM) | GC Content (%) | Repeat Density (%) | Branch Length (My) | Inversions |
|------------|-----------|-----------------|----------------|--------------------|--------------------|------------|
| 1 (FAL2)   | 157.4     | 320             | 39             | 0.38               | 4449.2             | 39         |
| 2 (FAL1)   | 119.8     | 245             | 39.2           | 0.23               | 4449.2             | 71         |
| 3 (FAL3)   | 115.7     | 230             | 39.4           | 0.38               | 4449.2             | 80         |
| 4 (FAL1A)  | 74.8      | 230             | 39.7           | 0.14               | 4449.2             | 108        |
| 5 (FAL4)   | 70.3      | 175             | 39.2           | 0.28               | 4437.3             | 104        |
| 6 (FAL5)   | 64.6      | 172             | 40.8           | 0.12               | 4398.1             | 79         |
| 7 (FAL7)   | 39.3      | 125             | 41.1           | 0.14               | 4242.1             | 48         |
| 8 (FAL6)   | 37.2      | 122             | 41.6           | 0.19               | 4088.8             | 35         |
| 9 (FAL8)   | 32        | 95              | 41.3           | 0.5                | 3973.8             | 23         |
| Z          | 59.7*     | 165             | 39.2           | 1.5                | 4449.2             | 121        |
| W          | 27        |                 | -              |                    | 3387.8             | 100        |

257 \*The sizes of chromosomes are nearly identical between the collared flycatcher and the  
 258 zebra finch except for chromosome Z (59.7Mb vs. 74.6Mb, respectively).  
 259

260 Compared to the autosomes, inversion fixation occurred on average 1.5× faster on  
 261 the Z chromosome and 2.5× faster on the W chromosome (two-sample paired *t*-tests with  
 262 the 80 clades as replicates, ChrZ:  $t_{79} = 2.2$ ,  $p = 0.034$ ; ChrW:  $t_{74} = 4.0$ ,  $p = 1.0 \times 10^{-4}$ ). The W  
 263 chromosome carried more pericentric inversions than the Z (paired *t*-test:  $t_{74} = 2.5$ ,  $p =$   
 264  $0.013$ ). When scaled by chromosome length, the difference on the W chromosome is more  
 265 dramatic with 3.7 inversions per Mb compared to 1.1 inversions per Mb on average for all  
 266 other chromosomes, including the Z. The genomic distribution of segregating inversion  
 267 polymorphisms within species, as well as variants apparently fixed in different populations  
 268 of the same species, was also biased towards the sex chromosomes. Of the 43 within-

269 species pericentric inversion variants identified from the cytological data, 14% were on the  
270 Z chromosome (6 of 43 variants) and 26% on the W chromosome (11 of 43; S2 Table).

271

## 272 **Discussion**

273 Large pericentric inversions have evolved often in passerine birds, with a minimum  
274 estimate of one inversion for every 5.3 million years of evolution. This estimate does not  
275 account for possible back-substitutions. Within 80 passerine clades, which include more  
276 recent events only and so the influence of structural back mutations is minimized, the  
277 average rate of pericentric inversion fixation for all chromosomes was one inversion fixed  
278 every 3.9 million years, which approximates the rate at which measurable hybrid infertility  
279 in birds appears [57], but ranged from no inversions fixed over the span of 27.7My (in the  
280 family Dicruridae) to one inversion fixed over 1.2My (in the genus *Chloris*; S5 Table). Many  
281 inversions have doubtless gone undetected. Twice as many individuals were karyotyped in  
282 the 31 passerine species found to have inversions segregating versus the study as a whole  
283 (9.9 versus 4.8 individuals, respectively; excluding 3 species of large sample size, Fig. 5; S2  
284 Table). Moreover, as I have restricted my analysis to only those pericentric inversions large  
285 enough to be detectable via cytological analysis (i.e. excluding small pericentric inversions  
286 as well as all paracentrics) these counts are surely an underestimate of the true extent of  
287 chromosome inversion variation in passerines, as has become clear from genomic studies  
288 [44,45,58].

289

---

290 **Fig 5. Natural log distribution of sample size for karyotyped species.** The average  
291 number of individuals karyotyped are indicated by arrows for all species (black arrow, 4.8

292 indiv.) and species where structural variants were observed (red arrow, 9.9 indiv.) after  
293 removing the three species where sampling effort was designed to study inversion  
294 polymorphism [S1-2 Tables].

---

296       The main finding from this study is that the strongest correlate of inversion fixation  
297 after accounting for time, is not range size, but range overlap. Variation in the number of  
298 inversions observed across clades positively scales with the proportion of sympatric  
299 species pairs each contains and sister species comparisons directly invoke range overlap as  
300 an important correlate. Indeed, the evidence suggests that while rearrangements occur  
301 more often in clades with larger ranges, thereby rejecting models based on drift and peak  
302 shifts [20,21,25], this effect is secondary to whether or not the ranges of these species are  
303 sympatric. Range overlap is pertinent to one particular model of inversion spread in which  
304 gene flow between partially reproductively isolated forms favors inversions, because F1  
305 hybrids more rarely recombine parental allelic combinations in the inverted region  
306 compared to collinear chromosomes. Altogether, the evidence suggests that pericentric  
307 inversions in passerines are adaptive and derive their selective advantage by keeping sets  
308 of locally adapted alleles together when gene flow between incipient species would  
309 otherwise break them up. I first consider caveats before returning to the main results.

310       The first issue is whether sympatry generally reflects a historical capacity for gene  
311 flow that is precluded by allopatry. While species with allopatric ranges may well have  
312 been largely allopatric since they first split, species with sympatric distributions may have  
313 become reproductively isolated before establishing secondary contact. Empirical evidence  
314 across a broad spectrum of taxonomic groups, however, suggests otherwise. Secondary

315 contact between incipient species has regularly been followed by hybridization and genetic  
316 exchange (reviewed in [59]). We know for birds that complete postmating isolation in the  
317 wild typically requires 3My or more [37,60], with hybrid zones regularly forming between  
318 taxa separated by that age ([60], S6 Table). This suggests that secondary contact often  
319 precedes the completion of reproductive isolation and could often select for chromosome  
320 inversion. Non-hybridizing sympatric pairs exhibit no discernible disparity in the extent of  
321 inversion differentiation when compared to hybridizing pairs (Fig. 3; S6 Table).

322         The second issue is that allopatric sister species may exhibit reduced inversion  
323 differentiation due to a lower mutational input because they are younger—less time for an  
324 inversion mutation to occur—or because they have smaller population sizes—lower  
325 inversion mutation rate per generation. However, I find no strong evidence that the  
326 phenomenon of reduced inversion differentiation among allopatric species is primarily a  
327 result of allopatric sister species tending to be younger and smaller in range than their  
328 sympatric counterparts (Table 3). Analysis of species triplets, which entirely control for  
329 age, also find no evidence that the extent of inversion differentiation between sister species  
330 and an outgroup taxon is a result of differences in sister range size (S7 Table). Together  
331 with the findings from hybridizing sister pairs, these results strongly suggest that range  
332 overlap makes an important contribution to chromosome inversion fixation.

333

### 334 Evaluating Support for Alternative Models of Inversion Evolution

335 Four alternative models of inversion fixation were considered to explain the distribution of  
336 pericentric inversions in passerines. First, in agreement with an earlier analysis [25], I find  
337 that genetic drift is unlikely to have been a strong force. The fixation rate for inversions on



338 all chromosome classes across the 80 passerine clades examined scales with body size  
339 corrected range size (autosomes:  $r = 0.38$ , chromosome Z:  $r = 0.32$ , and chromosome W:  $r =$   
340  $0.25$ ; S5 Table) while fixation rate by drift should, to a first approximation, be population-  
341 size independent [20–22,25].

342 Assuming rates of evolution by breakpoint selection and meiotic drive models  
343 should be largely dependent on mutagenic input, results do not support these models  
344 either, because range size is not a strong correlate, and because of the distribution across  
345 chromosomes (see below). Indeed, no mutagenic expectation of inversion fixation well  
346 explained the genomic distribution of autosomal pericentric inversions across the 410  
347 passerine species examined in this study (Tables 4, S10). These findings suggest that a  
348 force beyond raw mutagenic input is responsible for heterogeneity in the extent of  
349 pericentric inversion differentiation observed in passerines. Indeed, results are consistent  
350 instead with an adaptive model in which an inversion has a selective advantage if it  
351 maintains – through recombination suppression – the a) ecological or b) reproductive  
352 differentiation of a population at risk of being homogenized by gene flow.

353

### 354 Gene Flow and Chromosome Inversion Fixation

355 The adaptive model of rearrangement evolution presented by Kirkpatrick and Barton [31]  
356 relies on gene flow between ecologically differentiated populations to facilitate the spread  
357 of an inversion. Under this model, an inversion that encompasses two or more loci carrying  
358 alleles favored in the environmental background of a population may be favored if  
359 recombination would otherwise break them up. One prediction is that species prone to  
360 ecological speciation may be more likely to fix inversions first, because divergent selection

361 on loci involved in local adaptation is strong and second because diverging forms are more  
362 likely to occur in sympatry, being ecologically differentiated, before postmating isolation is  
363 complete [61]. For example, finch-like forms appear to speciate ecologically and achieve  
364 sympatry more quickly than insectivores [61], so the model of local ecological adaptation  
365 predicts finches should carry more inversion differences. While classifications of ecology in  
366 this study were crude, feeding guild and inversion accumulation are not correlated (S7  
367 Table). Future empirical efforts to examine the genic content and targets of selection within  
368 inversions, like those in flies [62,63], mosquitoes [64], butterflies [6,12,65], sticklebacks  
369 [13,66], and monkeyflowers [11,18] will be more powerful ways to assess the degree to  
370 which ecology has shaped the evolutionary trajectory of inversions in passerines.

371 In an extension of the local adaptation model, hybridization between incipient species  
372 creates a selective advantage for a chromosome inversion that maintains linkage between  
373 loci locally adapted to the genetic backgrounds of hybridizing taxa. For example, alleles at  
374 loci involved in pre- and/or postmating isolation are favored when kept in tight linkage by  
375 an inversion because of the increased production of unfit hybrids when they recombine.  
376 The likelihood of inversion differentiation under this model is expected to be most strongly  
377 associated with the frequency with which gene flow is part of the speciation process. As  
378 geographic isolation precludes hybridization, there is no selective advantage for a novel  
379 inversion to capitalize on and species that achieve reproductive isolation in allopatry  
380 should maintain chromosome co-linearity. This model has support from both clade and  
381 sister species analyses.

382 Two extreme examples illustrate the case for a role of range overlap in inversion  
383 fixation. First, tits (family Paridae) in the genera *Periparus* and *Pardaliparus* last shared a

384 common ancestor 7Ma (5.2 – 8.9Ma, 95% HPD), have largely allopatric distributions (no  
385 pair of species overlap in range more than 20%), and no known inversion differences. In  
386 stark contrast, an Asian clade of tits in the genus *Poecile* diverged 4.3Ma (3.1 – 5.6Ma, 95%  
387 HPD), are largely sympatric (2 of pairs), and the species examined differ by up to seven  
388 pericentric inversions (S5 Table). Natural hybrids between *Poecile montanus* and *P.*  
389 *palustris* have been recorded in the wild [51], more directly linking gene flow to inversion  
390 evolution. A second example comes from greenfinches in the genus *Chloris* (family  
391 Fringillidae, Fig. 4). Inversion differentiation between *C. sinica* and sympatric *C. ambigua*  
392 has outpaced inversion differentiation between *C. sinica* and allopatric *C. chloris* (Fig. 4).  
393 Further suggesting a positive interaction between gene flow and inversion evolution, *C.*  
394 *ambigua* and *C. sinica* hybridize at low frequencies where their ranges overlap [51].

395

## 396 Genomic Distribution of Pericentric Inversions

397 The distribution of chromosome inversions detected using comparative genomic  
398 approaches in birds is positively associated with chromosome size [44,45], and inversion  
399 breakpoints are often located in regions with elevated recombination rates, GC content, and  
400 repeat density [44]. These results were not replicated here. A primary reason for this  
401 difference likely resides in the different size classes of inversions considered between  
402 studies [25]. Inversions detected from comparing high-resolution linkage maps [44] or  
403 whole genome alignments [45] are capable of finding structural variants orders of  
404 magnitude smaller than the exclusively large inversions I identified from cytological data.  
405 Indeed, the pericentric inversions considered here may be of greater evolutionary  
406 relevance as they potentially come with both higher fitness costs and greater selective

407 advantages than the more comprehensive set of inversions found in comparative genomic  
408 surveys.

409         However, sex chromosomes do accumulate pericentric inversions more rapidly than  
410 the autosomes (Tables 4, S8), despite having smaller population sizes. A quarter of all  
411 identified inversion polymorphisms occur on the W chromosome while 14% are on the Z  
412 chromosome. The higher rate of sex chromosome inversion evolution could be considered  
413 a consequence of sex chromosomes possessing a higher structural mutation rate; lower  
414 fitness costs for structural rearrangements, a greater influence of genetic drift, or – in the  
415 case of the Z chromosome – a greater fitness benefit to a recombination modifier. I find no  
416 evidence for an influence of drift in governing variation in inversion fixation on any  
417 chromosome or for a higher mutation rate on the Z compared to the autosomes. Inference  
418 about the W chromosome is difficult as its features are not well understood. In contrast, a  
419 recent study finds that positive selection is the driving force responsible for elevated rates  
420 of functional differentiation observed for Z-linked genes in six species of Galloanserae [67].  
421 These are ideal conditions for inversions on the Z chromosome to be favored as  
422 recombination modifiers when differentiation occurs with gene flow. One route to further  
423 understanding will come from explicit studies of the selective forces maintaining inversion  
424 polymorphisms within species [7–9].

425

## 426 **Materials and Methods**

### 427 **Identifying Inversions**

428 I called chromosome inversions from classic studies of gross karyotype structure that  
429 encompass nearly 8% of all passerine species and >50% of passerine families. Of the 427

430 passerine species that have had their karyotypes described, I discarded 15 because the  
431 cytological data was not of sufficiently high quality to include in this study and two because  
432 no suitable genetic data currently exists for them and no tissue materials were available. I  
433 analyzed cytological data for the remaining 410 species, representing birds from 59  
434 families (S1 Table). Data was sourced from 110 studies that span five decades of cytological  
435 research (S1 Table). Methods utilized to describe karyotype varied from simple Giemsa  
436 staining to fluorescent *in situ* hybridization with chromosome painting. Sampling rigor  
437 varied across studies with respect to the number (average of 7 karyotyped individuals per  
438 taxon, range from 1 to 432; Fig. 5) and sex representation of each species (data from both  
439 males and females in 296 of 410 species; S1 Table). Sampling information was not given for  
440 29 species (S1 Table). Due to the considerable heterogeneity in the quality and quantity of  
441 karyotype descriptions between species and studies, I focus on a simple yet powerful trait  
442 with which to infer chromosome inversion differences between and within species:  
443 centromere position.

444         For each species, I converted centromere position for the 9 largest autosomal  
445 chromosomes and both sex chromosomes into character state data (S1 Table). I scored  
446 each chromosome for approximate centromere position (i.e., whether they were  
447 metacentric, sub-metacentric, sub-telocentric, or telocentric), following conventions  
448 established by Levan et al. [68]. I identified homologous chromosomes between species by  
449 a combination of their physical size, shared banding pattern, and matching chromosome  
450 painting, as the information was available. I treated centromere position of a chromosome  
451 as distinct when species shared the same general classification (e.g., both were sub-  
452 metacentric) but the authors noted that the banding pattern flanking the centromere

453 consistently differed. I only include pericentric inversions in my analyses as the cytological  
454 data has far less power to identify paracentric inversions (those not encompassing the  
455 centromere). Centromere repositioning can result from processes other than pericentric  
456 inversion, such as the redistribution of heterochromatin [69,70] and the evolution of neo-  
457 centromeres [70,71]. I found no evidence, however, for either of these alternative  
458 mechanisms of centromere repositioning in the 85 species with banding data available to  
459 test for them as centromere movement was supported by inversion of proximal banding  
460 patterns (Table S1).

461         While the distribution of fixed inversion differences can be used to infer historical  
462 patterns of selection, the mechanisms of selection affecting inversions are best studied  
463 when rearrangements still segregate in natural populations. I therefore evaluated all  
464 species for the occurrence of pericentric inversion polymorphisms and for the presence of  
465 inversions present in different parts of species ranges (S1-2 Tables). Polymorphisms  
466 segregating within populations were often noted in the paper of interest, but the majority  
467 of geographic variants are first reported in this study, as they generally depend on  
468 comparing different published studies (S2 Table). Of the 50 total rearrangement  
469 polymorphisms identified, two are likely a product of chromosome translocation and three  
470 are shared between species – two across three species and one between two species (S2  
471 Table).

472

### 473 Phylogenetic Analyses

474 In order to characterize the phylogenetic distribution of chromosome inversion fixation, I  
475 built a time-dated phylogeny for the 410 passerine species with karyotype data available. I

476 gathered sequence data from six genes: two mitochondrial: *cytb* and *ND2*, and four nuclear:  
477 myoglobin (*MG*) exons 2-3, ornithine decarboxylase (*ODC*) exons 6-8, beta-fibrinogen  
478 (*FIB5*) exons 5-6, and recombination activating protein-1 (*RAG1*). Data were primarily  
479 sourced from GenBank. For 12 karyotyped species with no or low sequence representation  
480 I generated the data myself using standard methods (Table S3). Phylogenetic and dating  
481 analyses were conducted using BEAST v1.8.2 [72]. Sequence data was partitioned by locus,  
482 each with its own uncorrelated lognormal relaxed clock, and assigned the optimal-fit model  
483 of sequence evolution estimated for each locus using jModelTest v0.1.1 [73]. The phylogeny  
484 was time-calibrated using 20 fossil calibrations broadly dispersed both in time and  
485 topology (S1 Fig.; S4 Table). This is, to my knowledge, the most extensive fossil calibration  
486 effort to date within Passeriformes. Each fossil calibration was applied to its corresponding  
487 node as a minimum age bound using a conservative uniform prior based on the age of the  
488 fossil itself and 80Ma. I ran BEAST for 50 million generations and sampled every 5000 for a  
489 total of 10,000 trees of which the first 1000 were discarded as burn in. I assessed run  
490 length and appropriate sampling for each parameter using Tracer v1.6 [74]. Using  
491 TreeAnnotator v1.7.2 [72], I extracted the maximum clade credibility tree, with associated  
492 confidence intervals for median node heights (Figs. 2, S2).

493

#### 494 Phylogenetic Distribution of Inversion Fixation

495 In order to map inversion evolution across the phylogeny, I estimated the ancestral  
496 centromere position (up to 4 possible states: metacentric, sub-metacentric, sub-telocentric,  
497 or telocentric) for each chromosome at each node in the tree by maximum likelihood in  
498 Mesquite v2.7.5 [75]. I obtained the maximum likelihood estimate for each ancestral

499 centromere position for each chromosome at every node. Inversions were inferred to have  
500 occurred upon branches where the karyotype of an internal node differed from subsequent  
501 nodes or the tips and was supported by a maximum likelihood,  $p > 0.75$ . I used this  
502 phylogenetic representation of inversion evolution in passerines to investigate the drivers  
503 of inversion fixation between species and within the genome. I conducted analyses at two  
504 different phylogenetic levels. First I defined 80 clades comprising between 3 to 85 species  
505 and, second, I used sister species pairs.

506

### 507 Chromosome Inversion Variation Between Clades

508 I partitioned the phylogeny of karyotyped taxa into 80 clades of closely related species in  
509 order to examine the factors associated with broad scale variation in chromosome  
510 inversion evolution. Many clades contain additional species that were not karyotyped, and  
511 hence not included in the tree, yet these species may influence chromosomal evolution in  
512 the focal taxa, e.g. through range overlap. To take this into account, I utilized phylogenies  
513 from 54 published family-level studies in order to determine which non-karyotyped  
514 species to include in clade level analyses (S5 Table). Clades were assigned based on the  
515 following grouping criteria: the two most distantly related karyotyped species were less  
516 than 15 million years diverged, member species' were the result of speciation within a  
517 single geographic region (i.e. all clade members speciated in Australia), member species  
518 were ecologically similar (i.e. finches, warblers, frugivores, nectarivores, or omnivores), a  
519 comprehensive family level phylogeny exists to identify non-karyotyped member taxa, and  
520 they encompassed at least three species including non-karyotyped taxa. After filtering



521 based on the above criteria, 285 of 410 karyotyped species were assigned to 80 clades (S1,  
522 S5 Tables).

523 I measured variation in karyotype evolution across passerine clades by counting the  
524 total number of inversions that had fixed on each chromosome, summing over all branches  
525 within the clade. I did not include inversion polymorphisms in this count unless the  
526 ancestral conformation of the chromosome polymorphic for an inversion, determined in  
527 Mesquite, was neither of the segregating forms. I calculated clade branch length as the sum  
528 of branch lengths for species with centromere position scored at each of the 9 autosomes,  
529 the Z, and W chromosomes. For example, if all species within a clade had complete  
530 karyotype records (i.e. centromere position scored for all 11 chromosomes), the branch  
531 length value of that clade was the sum of all branches multiplied by a factor of 11. For  
532 species missing data for a chromosome, the length of the branch leading to that species was  
533 removed from the clade total according to the total number of missing chromosomes (i.e. if  
534 a species was missing data at two chromosomes then 2× the branch length to that species  
535 were subtracted from the clade total).

536 I collected range overlap, range size, and body mass data from the complete taxon  
537 set for each clade (i.e. including both karyotyped and non-karyotyped species) in order to  
538 evaluate the extent to which variation in demography (population size) and speciation  
539 history (range overlap) has impacted inversion evolution (S5 Table). I extracted range data  
540 for all species from naturereserve.org using the programs Sp [76] and PBSmapping [77] in R.  
541 I assigned each clade a range size value corresponding to the median range size (km<sup>2</sup>) of all  
542 member taxa. Median body mass (g) for each clade was calculated from Dunning [78]. I  
543 used range size together with body mass in mixed models as proxies for population size

544 based on the positive relationship between the geographic area a species occupies and its  
545 nucleotide diversity [79–82] and the negative relationship generally observed between  
546 body size and population density [83]. I assigned a range overlap score to each clade based  
547 on the proportion of all species pairs whose ranges overlap by >20% and/or are known to  
548 hybridize in the wild [51]. I include hybridizing taxa together with taxa whose ranges are  
549 sympatric because both imply there is at least the potential for gene flow between taxa.  
550 Lastly, I considered a broad role for ecology on chromosome inversion evolution across  
551 clades according to the feeding guild used when defining clades (i.e. clades defined as  
552 comprising granivores, insectivores, frugivores, or omnivores; [33]).

553         In order to improve the interpretability of regression coefficients, the total number  
554 of inversions, branch length, range size, and body mass were log transformed, range  
555 overlap was arcsine square root transformed, and all variables were centered before  
556 analysis [84]. I then evaluated the extent to which the number of inversions that had fixed  
557 in each clade was associated with branch length, range overlap, range size, body mass, and  
558 ecology using generalized least squares to take into account phylogenetic relationships  
559 [85]. To do this, I used the NLME package in R [86], with the expected error covariance  
560 matrix computed based on the phylogenetic distances between clades (S3 Fig.). To assess  
561 the relative importance of each factor on the number of inversions fixed in each clade, I  
562 compared all possible models and selected the best-fit model based on sample size-  
563 corrected information criteria (AICc) using the R package MuMIn [50].

564

565 Chromosome Inversion Variation Between Sister Species

566 I also considered the distribution of inversions between sister species, including both fixed  
567 differences and inversions segregating in one taxon but not the other. I determined which  
568 karyotyped species pairs were true sisters using the available phylogenetic literature (S6  
569 Table). I considered a sister pair to hybridize if they had documented hybrid zones or  
570 extensive natural hybridization where they co-occur [51]. In total, I identified 47 true  
571 sisters with both species karyotyped, of which 12 are known to regularly hybridize in  
572 nature (S6 Table).

573 For all 47 sister pairs, I calculated the number of inversion differences between  
574 them, their time to common ancestry, average range size, range overlap, and whether they  
575 are known to hybridize in the wild. Inversion differentiation was scored both as a binary  
576 character (no inversions or at least one inversion difference) and as a count (total number  
577 of inversion differences). Range overlap was evaluated as a binary character: no overlap or  
578 some overlap. I only used this binary categorization because subdividing sisters who  
579 overlapped in range into either parapatric (< 20% overlap) or sympatric (>20% overlap)  
580 bins did not improve the fit of any model or alter the results in any way. I used a linear  
581 model to examine the interaction between the number of sister pair inversion differences  
582 and each factor (age, range size, range overlap, and hybridization) after transforming the  
583 continuous character data as described for analysis of clades. Lastly, I assessed whether  
584 sister species with overlapping ranges, and the subset of sympatric sisters known to  
585 hybridize, are more likely to differ by an inversion than allopatric sisters using *t*-tests.

586 Genetic distance is not time but rather an estimate of time, and one that can come  
587 with substantial error. This error can diminish the true contribution of time and elevate the  
588 importance of alternative factors [52]. A method to completely control for the potentially

589 confounding influence of time is the use of species triplets [52–54]. A triplet consists of a  
590 sister species pair (A, B) and a single outgroup taxon (O). Both sister taxa have by  
591 definition been separated from the outgroup for the same length of time. If O overlaps B but  
592 not A, then the presence of more inversion differences between O and B than O and A gives  
593 strong support for a role of range overlap independent of time (see Fig. 4). I assembled a  
594 set of species triplets from the phylogeny of karyotyped species and published phylogenies,  
595 using the following criteria: both sister species A and B have been karyotyped, A and B are  
596 allopatric, and B overlaps in range with O but species A does not. This resulted in just 5  
597 triplets (S7 Table). I relaxed the criteria to allow 1) range overlap between A and B and 2)  
598 range overlap between A and O so long as they were not sympatric (i.e. ranges overlapped  
599 less than 20%) and overlapped in range less than B and O. The average extent of range  
600 overlap between species A and O, when they did overlap, was 3× less than the extent of  
601 range overlap between B and O (S7 Table). Nineteen triplets were present after applying  
602 the relaxed filtering criteria (S7 Table).

603 I counted the number of inversions inferred to have occurred along the branches  
604 leading to species A and B, respectively, based on the distribution of fixed inversions in the  
605 complete karyotyped species phylogeny. I also included inversion polymorphisms found in  
606 one but not the other taxon. I scored each triplet as follows: more inversions in A than B,  
607 more inversions in B than A, or no difference in the number of inversions between A and B.  
608 I evaluated the direction and significance of the relationship between range overlap and  
609 inversion evolution across all triplets by applying a signed rank test to those sisters where  
610 the number of inversions differed.

611

## 612 Genomic Distribution of Chromosome Inversions

613 Inversion fixation models that depend heavily on mutational input (e.g. meiotic drive and  
614 breakpoint selection) predict a strong correlation with range size but they also predict a  
615 strong association with mutation rate. In a final analysis to examine the extent to which  
616 inversion evolution is a mutation limited process, I examined the distribution of  
617 chromosome inversions across the genome and evaluated the degree to which the number  
618 of inversions fixed on a chromosome (S8 Table) was associated with four possible  
619 mutagenic processes. First, if the mutation rate for inversions is constant per DNA base, the  
620 number of inversions should be proportional to chromosome size. Second, because  
621 inversions are derived from double-stranded meiotic breaks, the number of inversions on a  
622 chromosome could best be predicted by its map length or GC content – features associated  
623 with the number of cross-overs per chromosome [87,88]. Third, as inversion breakpoints  
624 are often located in repeat-rich regions of chromosomes [43,44], I tested for an association  
625 between the number of inversions and a chromosome's repeat density. Fourth, I asked if  
626 the dynamics of inversion fixation on the sex chromosomes and the autosomes differ [25].  
627 Mutation rates on the Z chromosome should be relatively high in birds because the Z  
628 spends  $\frac{2}{3}$  of the time in males, however this mutational advantage needs to overcome the  
629 fact that there are only  $\frac{3}{4}$  as many copies of the Z as each of the autosomes [89,90]. In  
630 contrast, the W chromosome should have a low mutation rate both because it spends all its  
631 time in females and there are  $\frac{1}{4}$  as many copies of the W as the autosomes.

632 Primary estimates of chromosome physical size, map length, and GC content were  
633 derived from the collared flycatcher genome assembly and linkage map [44] and  
634 chromosome repeat density was estimated from a RepeatMasker annotation of the zebra

635 finch genome (<http://www.repeatmasker.org>; [55]). I use chromosome size and map  
636 length data from the collared flycatcher but obtained identical results when analyses were  
637 repeated using chromosome size and map distance data derived from zebra finch [42,56]  
638 and hooded crow (*Corvus cornix* [91]; S10 Table). Comparative genomic studies indicate  
639 that chromosome size (excluding the W chromosome), GC content, and repeat density are  
640 conserved even between species in different avian orders [44,45,92]. While the  
641 recombination landscape may have phylogenetic signal [93–95], recombination hotspots  
642 are well maintained in passerines [58].

643 I used data from all 410 karyotyped species to examine the correlation between a  
644 chromosome's inversion fixation rate and its physical size, GC content, repeat density, and  
645 map length, using each chromosome as a replicate. In order to account for species with  
646 missing data I use inversion fixation rate (total number of inversions fixed on a  
647 chromosome divided by the combined branch length for all species with data for that  
648 chromosome) rather than inversion number (S1 Table). Independent variables were log-  
649 transformed. I evaluated support for alternative mutagenic hypotheses by comparing  
650 between all possible linear models and selected the best-fit model using the R package  
651 MuMIn [50]. Restricting the analysis to the 291 species with complete karyotype data (i.e.  
652 documented centromere position for all 11 chromosomes) yielded a similar result (S10  
653 Table). Finally, I tested for significant differences in the rate of inversion fixation between  
654 the autosomes, Z, and W chromosomes using the 80 independent passerine clades defined  
655 above as replicates and paired *t*-tests.

656

657 **Acknowledgements**

658 I thank N.S. Bulatova, B.S.W. Chang, E.J. de Lucca, G. Semenov, P. Tang, I.M. Ventura, Y. Wu,  
659 and the University of Chicago Library for their help in accessing cytological studies not  
660 currently available online. I thank S.G. Dubay, T.D. Price, Supriya, and A.E. White for their  
661 assistance with statistical analyses and figure aesthetics. Tissue materials for species  
662 without data on GenBank came from the Kansas University Biodiversity Institute and  
663 Natural History Museum. Thanks to M. Sorenson and C. H. Oliveros for sharing unpublished  
664 phylogenetic results. A.E. Johnson provided original artwork of the *Chloris* greenfinches  
665 used in Fig. 2. I am grateful to the assistance of T.D. Price for his helpful comments and  
666 suggestions on multiple versions of this manuscript and to M. Przeworski for her feedback  
667 on a single version.

## 668 **References:**

- 669 1. Hoffmann AA, Rieseberg LH. Revisiting the impact of inversions in evolution: from  
670 population genetic markers to drivers of adaptive shifts and speciation?. Annual review of  
671 ecology, evolution, and systematics. 2008; 39: 21.  
672
- 673 2. Faria R, Navarro A. Chromosomal speciation revisited: rearranging theory with pieces of  
674 evidence. Trends in ecology & evolution. 2010; 25: 660-669.  
675
- 676 3. Lemaitre C, Braga MD, Gautier C, Sagot MF, Tannier E, Marais GA. Footprints of  
677 inversions at present and past pseudoautosomal boundaries in human sex chromosomes.  
678 Genome biology and evolution. 2009; 1: 56-66.  
679
- 680 4. Wilson MA, Makova KD. Genomic analyses of sex chromosome evolution. Annual review  
681 of genomics and human genetics. 2009; 10: 333-354.  
682
- 683 5. Wright AE, Harrison PW, Montgomery SH, Pointer MA, Mank JE. Independent stratum  
684 formation on the avian sex chromosomes reveals inter-chromosomal gene conversion and  
685 predominance of purifying selection on the W chromosome. Evolution. 2014; 68: 3281-95.  
686
- 687 6. Kunte K, Zhang W, Tenger-Trolander A, Palmer DH, Martin A, Reed RD, Mullen SP,  
688 Kronforst MR. Doublesex is a mimicry supergene. Nature. 2014; 507: 229-32.  
689
- 690 7. Küpper C, Stocks M, Risse JE, dos Remedios N, Farrell LL, McRae SB, Morgan TC,  
691 Karlionova N, Pinchuk P, Verkuil YI, Kitaysky AS. A supergene determines highly divergent  
692 male reproductive morphs in the ruff. Nature genetics. 2015.  
693
- 694 8. Lamichhaney S, Fan G, Widemo F, Gunnarsson U, Thalmann DS, Hoepfner MP, Kerje S,  
695 Gustafson U, Shi C, Zhang H, Chen W. Structural genomic changes underlie alternative  
696 reproductive strategies in the ruff (*Philomachus pugnax*). Nature genetics. 2016; 48: 84-8.  
697
- 698 9. Tuttle EM, Bergland AO, Korody ML, Brewer MS, Newhouse DJ, Minx P, Stager M, Betuel  
699 A, Cheviron ZA, Warren WC, Gonser RA. Divergence and Functional Degradation of a Sex  
700 Chromosome-like Supergene. Current Biology. 2016.  
701
- 702 10. Anderson AR, Hoffmann AA, Mckechnie SW, Umina PA, Weeks AR. The latitudinal cline  
703 in the In (3R) Payne inversion polymorphism has shifted in the last 20 years in Australian  
704 *Drosophila melanogaster* populations. Molecular Ecology. 2005; 14: 851-8.  
705
- 706 11. Lowry DB, Willis JH. A widespread chromosomal inversion polymorphism contributes  
707 to a major life-history transition, local adaptation, and reproductive isolation. PLoS Biol.  
708 2010; 8: e1000500.  
709



- 710 12. Joron M, Frezal L, Jones RT, Chamberlain NL, Lee SF, Haag CR, Whibley A, Becuwe M,  
711 Baxter SW, Ferguson L, Wilkinson PA. Chromosomal rearrangements maintain a  
712 polymorphic supergene controlling butterfly mimicry. *Nature*. 2011; 477: 203-206.  
713
- 714 13. Jones FC, Grabherr MG, Chan YF, Russell P, Mauceli E, Johnson J, Swofford R, Pirun M,  
715 Zody MC, White S, Birney E. The genomic basis of adaptive evolution in threespine  
716 sticklebacks. *Nature*. 2012; 484: 55-61.  
717
- 718 14. Rieseberg LH. Chromosomal rearrangements and speciation. *Trends in Ecology &*  
719 *Evolution*. 2001; 16: 351-358.  
720
- 721 15. Noor MA, Grams KL, Bertucci LA, Reiland J. Chromosomal inversions and the  
722 reproductive isolation of species. *Proceedings of the National Academy of Sciences*. 2001;  
723 98: 12084-12088.  
724
- 725 16. Brown KM, Burk LM, Henagan LM, Noor MA. A test of the chromosomal rearrangement  
726 model of speciation in *Drosophila pseudoobscura*. *Evolution*. 2004; 58: 1856-1860.  
727
- 728 17. Ayala D, Guerrero RF, Kirkpatrick M. Reproductive isolation and local adaptation  
729 quantified for a chromosome inversion in a malaria mosquito. *Evolution*. 2013; 67: 946-  
730 958.  
731
- 732 18. Fishman L, Stathos A, Beardsley PM, Williams CF, Hill JP. Chromosomal rearrangements  
733 and the genetics of reproductive barriers in *Mimulus* (monkey flowers). *Evolution*. 2013;  
734 67: 2547-2560.  
735
- 736 19. King M. *Species evolution: the role of chromosome change*. Cambridge University Press;  
737 1995.  
738
- 739 20. Lande R. Effective deme sizes during long-term evolution estimated from rates of  
740 chromosomal rearrangement. *Evolution*. 1979: 234-251.  
741
- 742 21. Lande R. The fixation of chromosomal rearrangements in a subdivided population with  
743 local extinction and colonization. *Heredity*. 1985; 54: 323-332.  
744
- 745 22. Hedrick PW. The establishment of chromosomal variants. *Evolution*. 1981: 322-332.  
746
- 747 23. Walsh JB. Rate of accumulation of reproductive isolation by chromosome  
748 rearrangements. *American Naturalist*. 1982: 510-532.  
749
- 750 24. Spirito F. The role of chromosomal change in speciation. *Endless forms: Species and*  
751 *speciation* (DJ Howard and SH Berlocher, eds.). Oxford Univ. Press, Oxford, UK. 1998: 320-  
752 329.  
753
- 754 25. Hooper DM, Price TD. Rates of karyotypic evolution in Estrildid finches differ between  
755 island and continental clades. *Evolution*. 2015; 69: 890-903.

- 756  
757 26. Wesley CS, Eanes WF. Isolation and analysis of the breakpoint sequences of  
758 chromosome inversion In (3L) Payne in *Drosophila melanogaster*. Proceedings of the  
759 National Academy of Sciences. 1994; 91: 3132-3136.  
760  
761 27. Puig M, Cáceres M, Ruiz A. Silencing of a gene adjacent to the breakpoint of a  
762 widespread *Drosophila* inversion by a transposon-induced antisense RNA. Proceedings of  
763 the National Academy of Sciences of the United States of America. 2004; 101: 9013-9018.  
764  
765 28. White MJ. Chain processes in chromosomal speciation. *Systematic Biology*. 1978; 27:  
766 285-298.  
767  
768 29. King M. *Species evolution: the role of chromosome change*. Cambridge University Press;  
769 1995.  
770  
771 30. Charlesworth D, Charlesworth B. Selection on recombination in clines. *Genetics*. 1979;  
772 91: 581.  
773  
774 31. Kirkpatrick M, Barton N. Chromosome inversions, local adaptation and speciation.  
775 *Genetics*. 2006; 173: 419-434.  
776  
777 32. Feder JL, Gejji R, Powell TH, Nosil P. Adaptive chromosomal divergence driven by mixed  
778 geographic mode of evolution. *Evolution*. 2011; 65: 2157-2170.  
779  
780 33. Del Hoyo J, Elliott A, Christie D. *Handbook of the birds of the world*.  
781  
782 34. Price TD, Hooper DM, Buchanan CD, Johansson US, Tietze DT, Alström P, Olsson U,  
783 Ghosh-Harihar M, Ishtiaq F, Gupta SK, Martens J. Niche filling slows the diversification of  
784 Himalayan songbirds. *Nature*. 2014; 509: 222-225.  
785  
786 35. Christidis L. *Animal cytogenetics 4: Chordata 3 B: Aves*. Gebrüder Borntraeger, Berlin,  
787 Germany. 1990.  
788  
789 36. Shields GF. Comparative avian cytogenetics: a review. *Condor*. 1982: 45-58.  
790  
791 37. Price T. *Speciation in birds*. Roberts and Co.; 2008.  
792  
793 38. Völker M, Backström N, Skinner BM, Langley EJ, Bunzey SK, Ellegren H, Griffin DK. Copy  
794 number variation, chromosome rearrangement, and their association with recombination  
795 during avian evolution. *Genome research*. 2010; 20: 503-511.  
796  
797 39. Stapley J, Birkhead TR, Burke T, Slate J. A linkage map of the zebra finch *Taeniopygia*  
798 *guttata* provides new insights into avian genome evolution. *Genetics*. 2008; 179: 651-667.  
799

- 800 40. Hansson B, Ljungqvist M, Dawson DA, Mueller JC, Olano-Marin J, Ellegren H, Nilsson JÅ.  
801 Avian genome evolution: insights from a linkage map of the blue tit (*Cyanistes caeruleus*).  
802 Heredity. 2010; 104: 67-78.  
803
- 804 41. Aslam ML, Bastiaansen JW, Crooijmans RP, Vereijken A, Megens HJ, Groenen MA. A SNP  
805 based linkage map of the turkey genome reveals multiple intrachromosomal  
806 rearrangements between the turkey and chicken genomes. BMC Genomics. 2010; 11: 647.  
807
- 808 42. Backström N, Forstmeier W, Schielzeth H, Mellenius H, Nam K, Bolund E, Webster MT,  
809 Öst T, Schneider M, Kempnaers B, Ellegren H. The recombination landscape of the zebra  
810 finch *Taeniopygia guttata* genome. Genome research. 2010; 20: 485-495.  
811
- 812 43. Skinner BM, Griffin DK. Intrachromosomal rearrangements in avian genome evolution:  
813 evidence for regions prone to breakpoints. Heredity. 2012; 108: 37-41.  
814
- 815 44. Kawakami T, Smeds L, Backström N, Husby A, Qvarnström A, Mugal CF, Olason P,  
816 Ellegren H. A high-density linkage map enables a second-generation collared flycatcher  
817 genome assembly and reveals the patterns of avian recombination rate variation and  
818 chromosomal evolution. Molecular ecology. 2014; 23: 4035-4058.  
819
- 820 45. Zhang G, Li C, Li Q, Li B, Larkin DM, Lee C, Storz JF, Antunes A, Greenwold MJ, Meredith  
821 RW, Ödeen A. Comparative genomics reveals insights into avian genome evolution and  
822 adaptation. Science. 2014; 346: 1311-1120.  
823
- 824 46. Prum RO, Berv JS, Dornburg A, Field DJ, Townsend JP, Lemmon EM, Lemmon AR. A  
825 comprehensive phylogeny of birds (Aves) using targeted next-generation DNA sequencing.  
826 Nature. 2015.  
827
- 828 47. Claramunt S, Cracraft J. A new time tree reveals Earth history's imprint on the evolution  
829 of modern birds. Science Advances. 2015; 1: e1501005.  
830
- 831 48. Yu, G. and T.T.Y. Lam. ggtree: a phylogenetic tree viewer for different types of tree  
832 annotations.  
833
- 834 49. Jenks, G.F., 1967. The data model concept in statistical mapping. International yearbook  
835 of cartography, 7:186-190.  
836
- 837 50. Bartoń K. MuMIn: multi-model inference. 2013. R package version; 1. 5.  
838
- 839 51. McCarthy EM. Handbook of avian hybrids of the world. New York: Oxford University  
840 Press; 2006.  
841
- 842 52. Hudson EJ, Price TD. Pervasive reinforcement and the role of sexual selection in  
843 biological speciation. Journal of Heredity. 2014; 105: 821-833.  
844

- 845 53. Noor MA. How often does sympatry affect sexual isolation in *Drosophila*?. The American  
846 Naturalist. 1997; 149: 1156-1163.  
847
- 848 54. Martin PR, Montgomerie R, Loughheed SC. Color patterns of closely related bird species  
849 are more divergent at intermediate levels of breeding-range sympatry. The American  
850 Naturalist. 2015; 185: 443-451.  
851
- 852 55. Smit AF, Hubley R, Green P. 2010 RepeatMasker Open-3.0. URL: [http://www.](http://www.repeatmasker.org)  
853 [repeatmasker.org](http://www.repeatmasker.org). 1996.  
854
- 855 56. Warren WC, Clayton DF, Ellegren H, Arnold AP, Hillier LW, Künstner A, Searle S, White  
856 S, Vilella AJ, Fairley S, Heger A. The genome of a songbird. Nature. 2010; 464: 757-762.  
857
- 858 57. Price TD, Bouvier MM. The evolution of F1 postzygotic incompatibilities in birds.  
859 Evolution. 2002; 56: 2083-2089.  
860
- 861 58. Singhal S, Leffler EM, Sannareddy K, Turner I, Venn O, Hooper DM, Strand AI, Li Q,  
862 Raney B, Balakrishnan CN, Griffith SC. Stable recombination hotspots in birds. Science.  
863 2015; 350: 928-932.  
864
- 865 59. Payseur BA, Rieseberg LH. A genomic perspective on hybridization and speciation.  
866 Molecular ecology. 2016.  
867
- 868 60. Weir JT, Price TD. Limits to speciation inferred from times to secondary sympatry and  
869 ages of hybridizing species along a latitudinal gradient. The American Naturalist. 2011;  
870 177: 462-469.  
871
- 872 61. Price TD. The roles of time and ecology in the continental radiation of the Old World  
873 leaf warblers (*Phylloscopus* and *Seicercus*). Philosophical Transactions of the Royal Society  
874 of London B: Biological Sciences. 2010; 365: 1749-1762.  
875
- 876 62. Kolaczkowski B, Kern AD, Holloway AK, Begun DJ. Genomic differentiation between  
877 temperate and tropical Australian populations of *Drosophila melanogaster*. Genetics. 2011;  
878 187: 245-260.  
879
- 880 63. Rane RV, Rako L, Kapun M, Lee SF, Hoffmann AA. Genomic evidence for role of inversion  
881 3RP of *Drosophila melanogaster* in facilitating climate change adaptation. Molecular  
882 ecology. 2015; 24: 2423-2432.  
883
- 884 64. Ayala D, Ullastres A, González J. Adaptation through chromosomal inversions in  
885 *Anopheles*. Frontiers in Genetics. 2014; 5: 129.  
886
- 887 65. Nishikawa H, Iijima T, Kajitani R, Yamaguchi J, Ando T, Suzuki Y, Sugano S, Fujiyama A,  
888 Kosugi S, Hirakawa H, Tabata S. A genetic mechanism for female-limited Batesian mimicry  
889 in *Papilio* butterfly. Nature genetics. 2015; 47: 405-409.  
890

- 891 66. Miller CT, Glazer AM, Summers BR, Blackman BK, Norman AR, Shapiro MD, Cole BL,  
892 Peichel CL, Schluter D, Kingsley DM. Modular skeletal evolution in sticklebacks is controlled  
893 by additive and clustered quantitative trait loci. *Genetics*. 2014; 197: 405-420.  
894
- 895 67. Dean R, Harrison PW, Wright AE, Zimmer F, Mank JE. Positive selection underlies  
896 Faster-Z evolution of gene expression in birds. *Molecular biology and evolution*. 2015; 32:  
897 2646-2656.  
898
- 899 68. Levan A, Fredga K, Sandberg AA. Nomenclature for centromeric position on  
900 chromosomes. *Hereditas*. 1964; 52: 201-220.  
901
- 902 69. Krasikova A, Daks A, Zlotina A, Gaginskaya E. Polymorphic heterochromatic segments in  
903 Japanese quail microchromosomes. *Cytogenetic and genome research*. 2009; 126: 148-155.  
904
- 905 70. Zlotina A, Galkina S, Krasikova A, Crooijmans RP, Groenen MA, Gaginskaya E,  
906 Deryusheva S. Centromere positions in chicken and Japanese quail chromosomes: de novo  
907 centromere formation versus pericentric inversions. *Chromosome research*. 2012; 20:  
908 1017-1032.  
909
- 910 71. Marshall OJ, Chueh AC, Wong LH, Choo KA. Neocentromeres: new insights into  
911 centromere structure, disease development, and karyotype evolution. *The American*  
912 *Journal of Human Genetics*. 2008; 82: 261-282.  
913
- 914 72. Drummond AJ, Rambaut A. BEAST: Bayesian evolutionary analysis by sampling trees.  
915 *BMC evolutionary biology*. 2007; 7: 214.  
916
- 917 73. Posada D. jModelTest: phylogenetic model averaging. *Molecular biology and evolution*.  
918 2008; 25: 1253-1256.  
919
- 920 74. Rambaut A, Suchard MA, Xie D, Drummond AJ. Tracer v1. 6.  
921
- 922 75. Maddison WP, Maddison DR. Mesquite: a modular system for evolutionary analysis.  
923
- 924 76. Pebesma EJ, Bivand RS. sp: classes and methods for spatial data. R package version 0.9-  
925 44.  
926
- 927 77. Schnute JT, Boers N, Haigh R, Couture-Beil A. PBSmapping: PBS Mapping 2.59. R  
928 package version. 2008; 2: 59.  
929
- 930 78. Dunning JB. Handbook of avian body masses. CRC, Boca Raton. 1993.  
931
- 932 79. Nevo E, Beiles A, Ben-Shlomo R. The evolutionary significance of genetic diversity:  
933 ecological, demographic and life history correlates. Springer Berlin Heidelberg; 1984.  
934
- 935 80. Cole CT. Genetic variation in rare and common plants. *Annual Review of Ecology,*  
936 *Evolution, and Systematics*. 2003: 213-237.

- 937  
938 81. Balakrishnan CN, Edwards SV. Nucleotide variation, linkage disequilibrium and  
939 founder-facilitated speciation in wild populations of the zebra finch (*Taeniopygia guttata*).  
940 Genetics. 2009; 181: 645-660.  
941  
942 82. Leffler EM, Bullaughey K, Matute DR, Meyer WK, Segurel L, Venkat A, Andolfatto P,  
943 Przeworski M. Revisiting an old riddle: what determines genetic diversity levels within  
944 species?. PLoS Biol. 2012; 10: e1001388.  
945  
946 83. White EP, Ernest SM, Kerkhoff AJ, Enquist BJ. Relationships between body size and  
947 abundance in ecology. Trends in ecology & evolution. 2007; 22: 323-330.  
948  
949 84. Schielzeth H. Simple means to improve the interpretability of regression coefficients.  
950 Methods in Ecology and Evolution. 2010; 1: 103-113.  
951  
952 85. Grafen A. The phylogenetic regression. Philosophical Transactions of the Royal Society  
953 of London. Series B, Biological Sciences. 1989; 326: 119-157.  
954  
955 86. Pinheiro J, Bates D, DebRoy S, Sarkar D, Team RC. nlme: Linear and nonlinear mixed  
956 effects models. 2012. R package version; 3: 103.  
957  
958 87. Baudat F, de Massy B. Regulating double-stranded DNA break repair towards crossover  
959 or non-crossover during mammalian meiosis. Chromosome research. 2007; 15: 565-577.  
960  
961 88. de Massy B. Initiation of meiotic recombination: how and where? Conservation and  
962 specificities among eukaryotes. Annual review of genetics. 2013; 47: 563-599.  
963  
964 89. Ellegren H, Fridolfsson AK. Male-driven evolution of DNA sequences in birds. Nature  
965 genetics. 1997; 17: 182-184.  
966  
967 90. Axelsson E, Smith NG, Sundström H, Berlin S, Ellegren H. Male-biased mutation rate and  
968 divergence in autosomal, Z-linked and W-linked introns of chicken and turkey. Molecular  
969 Biology and Evolution. 2004; 21: 1538-1547.  
970  
971 91. Poelstra JW, Vijay N, Bossu CM, Lantz H, Ryll B, Müller I, Baglione V, Unneberg P,  
972 Wikelski M, Grabherr MG, Wolf JB. The genomic landscape underlying phenotypic integrity  
973 in the face of gene flow in crows. Science. 2014; 344: 1410-1414.  
974  
975 92. Ellegren H. The evolutionary genomics of birds. Annual Review of Ecology, Evolution,  
976 and Systematics. 2013; 44: 239-259.  
977  
978 93. Dumont BL, Payseur BA. Evolution of the genomic rate of recombination in mammals.  
979 Evolution. 2008; 62: 276-294.  
980  
981 94. Dumont BL, Payseur BA. Evolution of the genomic recombination rate in murid rodents.  
982 Genetics. 2011; 187: 643-657.

- 983  
984 95. Smukowski CS, Noor MA. Recombination rate variation in closely related species.  
985 Heredity. 2011; 107: 496-508.

986 **Supporting Information**

987 **S1 Fig. Phylogenetic distribution of fossil calibrations.** Calibration nodes numbered  
988 following S4 Table and labeled (red circles). Species included solely for calibration  
989 purposes colored red.

990 **S2 Fig. Pericentric inversion fixation rate variation across passerine birds.** The  
991 phylogenetic relationships between the 410 karyotyped species in this study are presented  
992 in a time-dated maximum clade credibility tree. Branches are color-coded according to the  
993 inferred rate of pericentric inversion fixation using the R package ggtree[48]. Rates are  
994 partitioned according to the Jenks natural breaks method where variance within bins is  
995 minimized, while variance between bins is maximized [49].

996 **S3 Fig. Phylogeny used in phylogenetic generalized least squares for clade level**  
997 **analysis.** Branch lengths are proportional to time and were used to compute the expected  
998 error covariance matrix between clades for phylogenetic generalized least-squares. Species  
999 identity for the 285 taxa assigned to clades is given in S1 Table. Clade information  
1000 (inversions, branch length, range size, range overlap, ecology, etc.) are given in S4 Table.

1001 **S1 Table. Chromosome character state matrix with references.**

1002 **S2 Table. Chromosome rearrangement polymorphisms.**

1003 **S3 Table. Loci used in phylogenetic analyses.**

1004 **S4 Table. Fossil calibration set with references.**

1005 **S5 Table. Clade data.**

1006 **S6 Table. Sister species data.**

1007 **S7 Table. Species triplet data.**

1008 **S8 Table. Genomic distribution of inversions across 80 passerine clades.**



1009 **S9 Table. Model comparison results for clade and sister species analyses.**

1010 **S10 Table. Model comparison results for genomic distribution of inversions.**

# Passerine Families

- |                             |                             |
|-----------------------------|-----------------------------|
| 1: Eurylamidae (1, 1)       | 31: Pellorniididae (3, 3)   |
| 2: Furnariidae (2, 2)       | 32: Leiothrichidae (14, 28) |
| 3: Thamnophilidae (4, 9)    | 33: Regulidae (1, 7)        |
| 4: Cotingidae (1, 3)        | 34: Bombycillidae (3, 0)    |
| 5: Tityridae (1, 2)         | 35: Sittidae (3, 6)         |
| 6: Tyrannidae (13, 32)      | 36: Certhiidae (1, 2)       |
| 7: Aegithinidae (1, 0)      | 37: Polioptilidae (1, 2)    |
| 8: Tephrodornithidae (1, 2) | 38: Troglodytidae (3, 5)    |
| 9: Campephagidae (3, 9)     | 39: Cinclidae (1, 1)        |
| 10: Oriolidae (3, 2)        | 40: Mimidae (3, 6)          |
| 11: Vireonidae (4, 2)       | 41: Sturnidae (8, 7)        |
| 12: Dicruridae (2, 0)       | 42: Turdidae (20, 28)       |
| 13: Monarchidae (1, 1)      | 43: Muscicapidae (35, 77)   |
| 14: Laniidae (8, 13)        | 44: Nectariniidae (1, 2)    |
| 15: Corvidae (15, 21)       | 45: Chloropseidae (2, 2)    |
| 16: Picathartidae (1, 4)    | 46: Peucedramidae (1, 4)    |
| 17: Remizidae (1, 2)        | 47: Prunellidae (2, 0)      |
| 18: Paridae (8, 14)         | 48: Ploceidae (3, 0)        |
| 19: Alaudidae (6, 9)        | 49: Estrildidae (34, 83)    |
| 20: Locustellidae (4, 8)    | 50: Passeridae (7, 19)      |
| 21: Acrocephalidae (5, 10)  | 51: Motacillidae (8, 15)    |
| 22: Hirundinidae (8, 13)    | 52: Fringillidae (21, 40)   |
| 23: Cisticolidae (2, 5)     | 53: Cardinalidae (7, 5)     |
| 24: Pycnonotidae (8, 11)    | 54: Thraupidae (45, 52)     |
| 25: Aegithalidae (3, 8)     | 55: Parulidae (6, 2)        |
| 26: Cettidae (1, 1)         | 56: Icteriidae (1, 3)       |
| 27: Phylloscopidae (9, 21)  | 57: Icteridae (9, 8)        |
| 28: Sylviidae (5, 10)       | 58: Emberizidae (17, 55)    |
| 29: Zosteropidae (5, 3)     | 59: Passerellidae (22, 38)  |
| 30: Timaliidae (3, 2)       |                             |

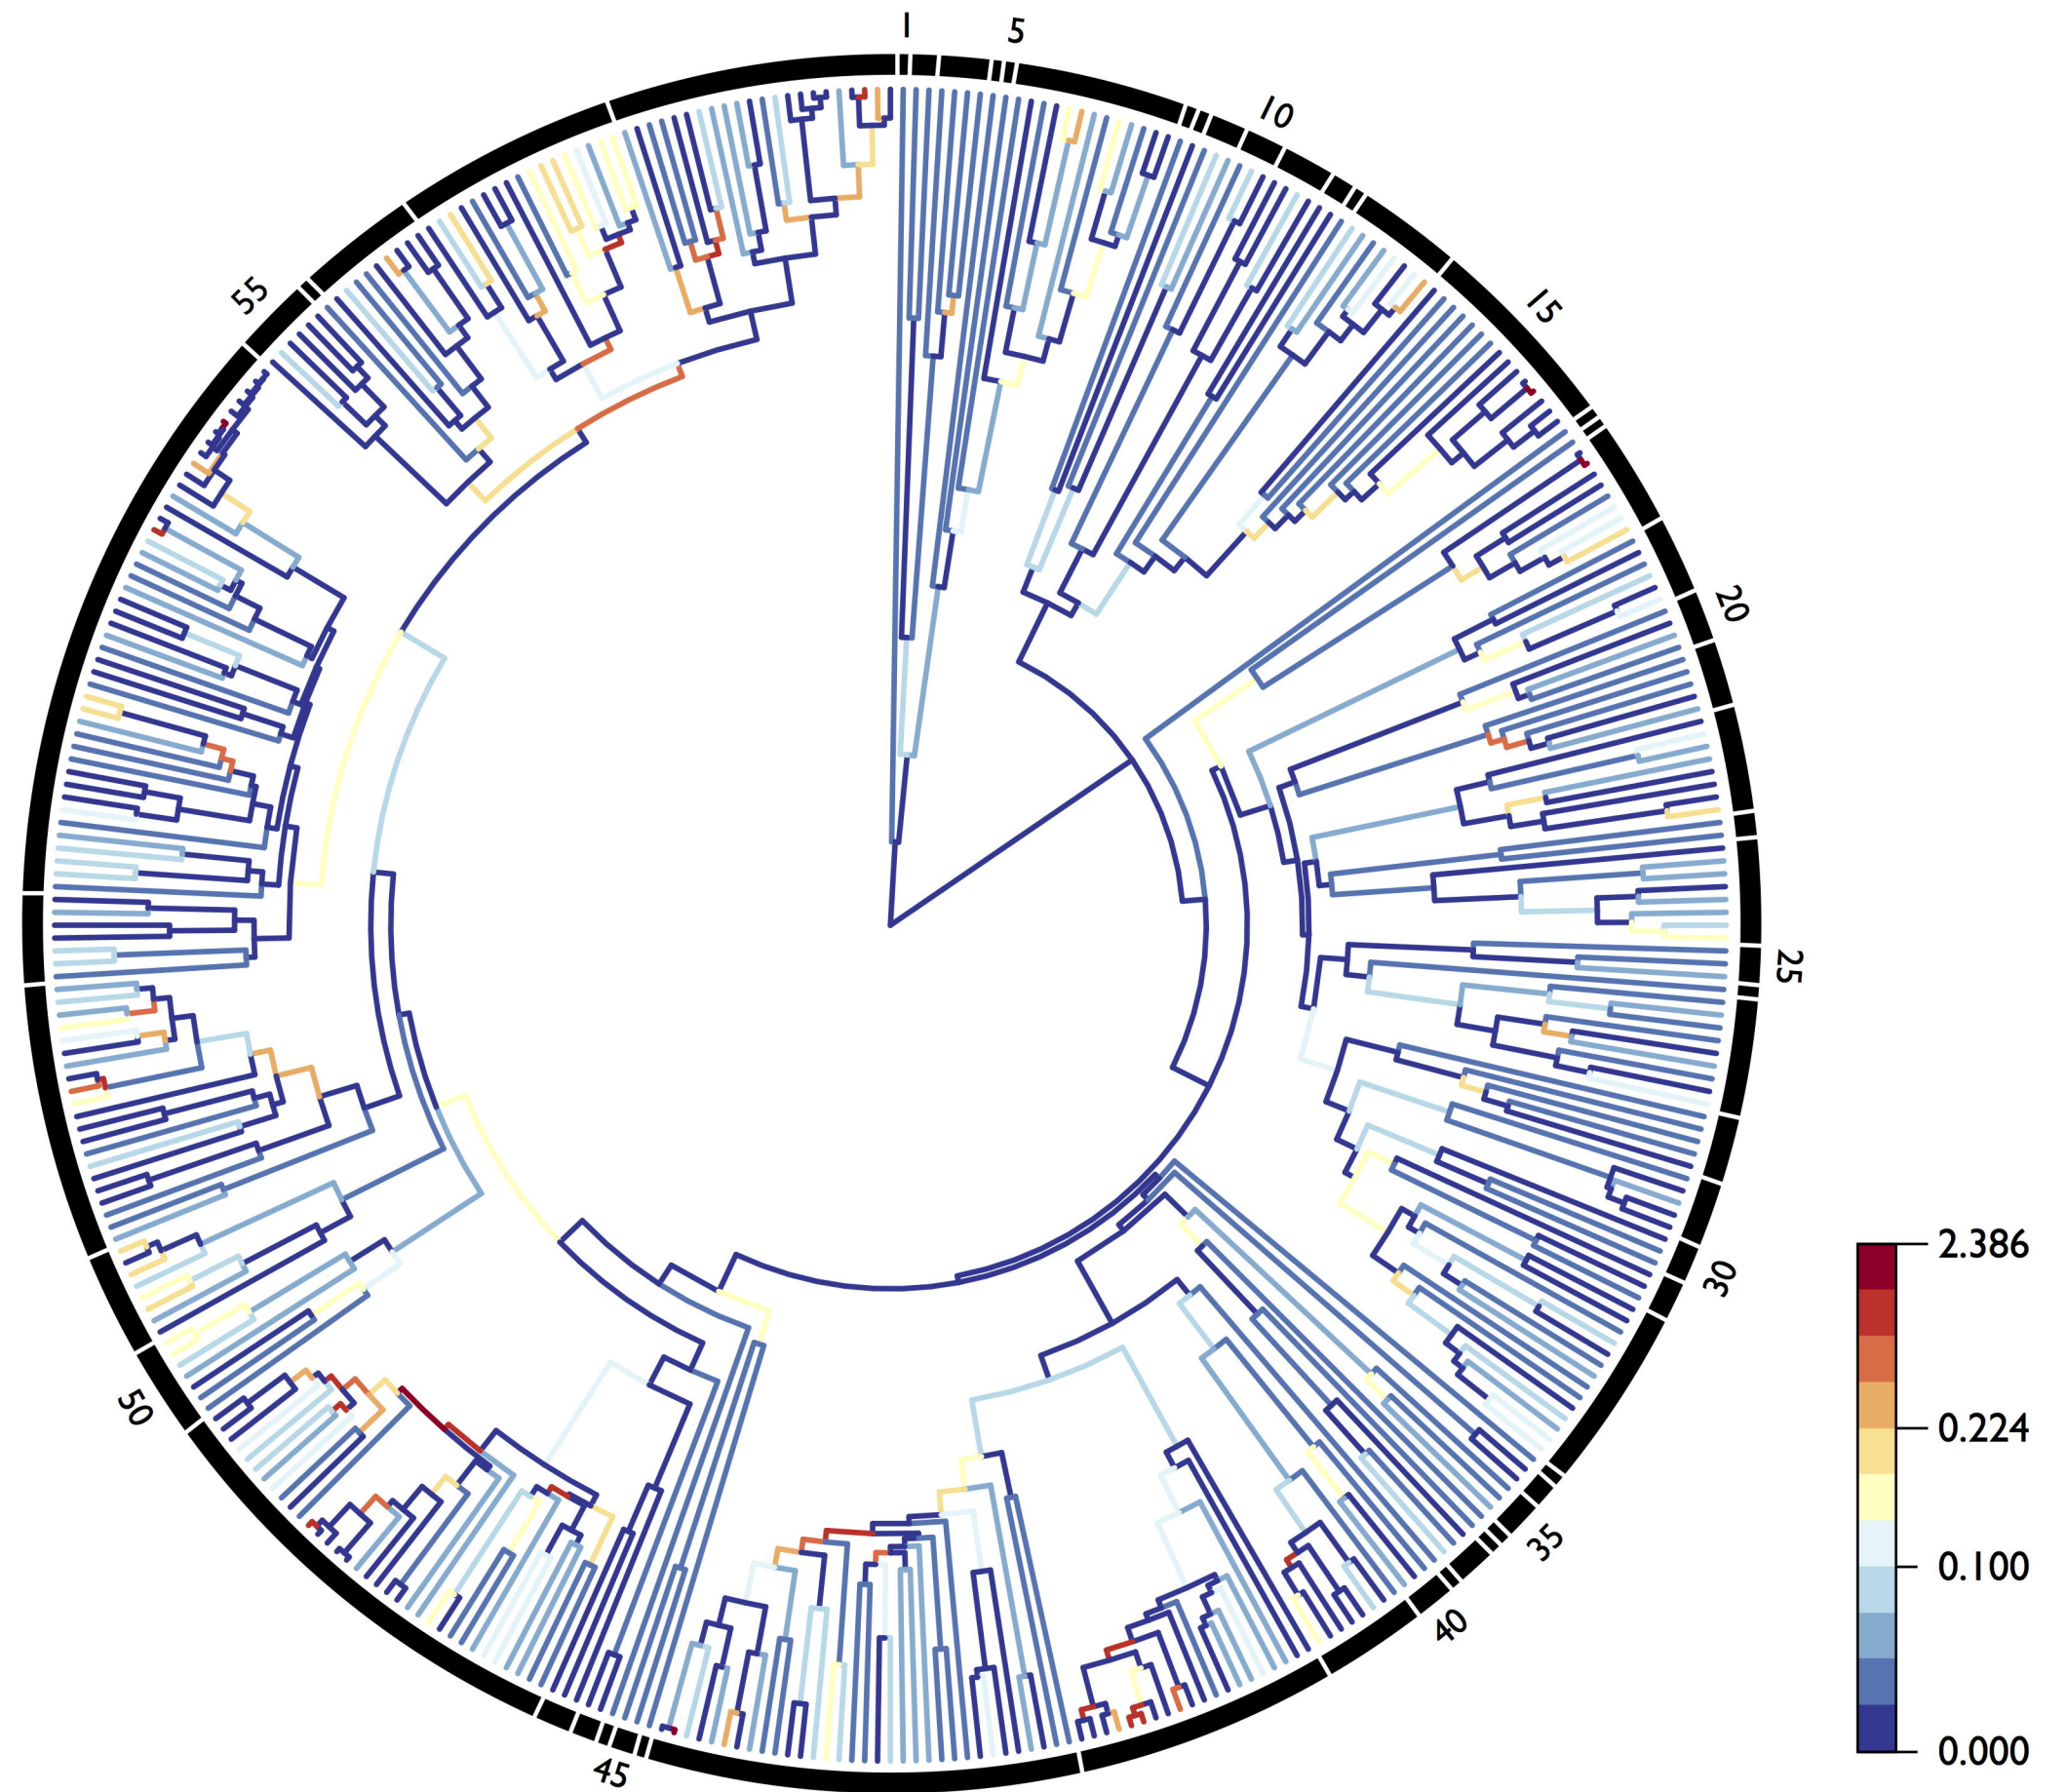

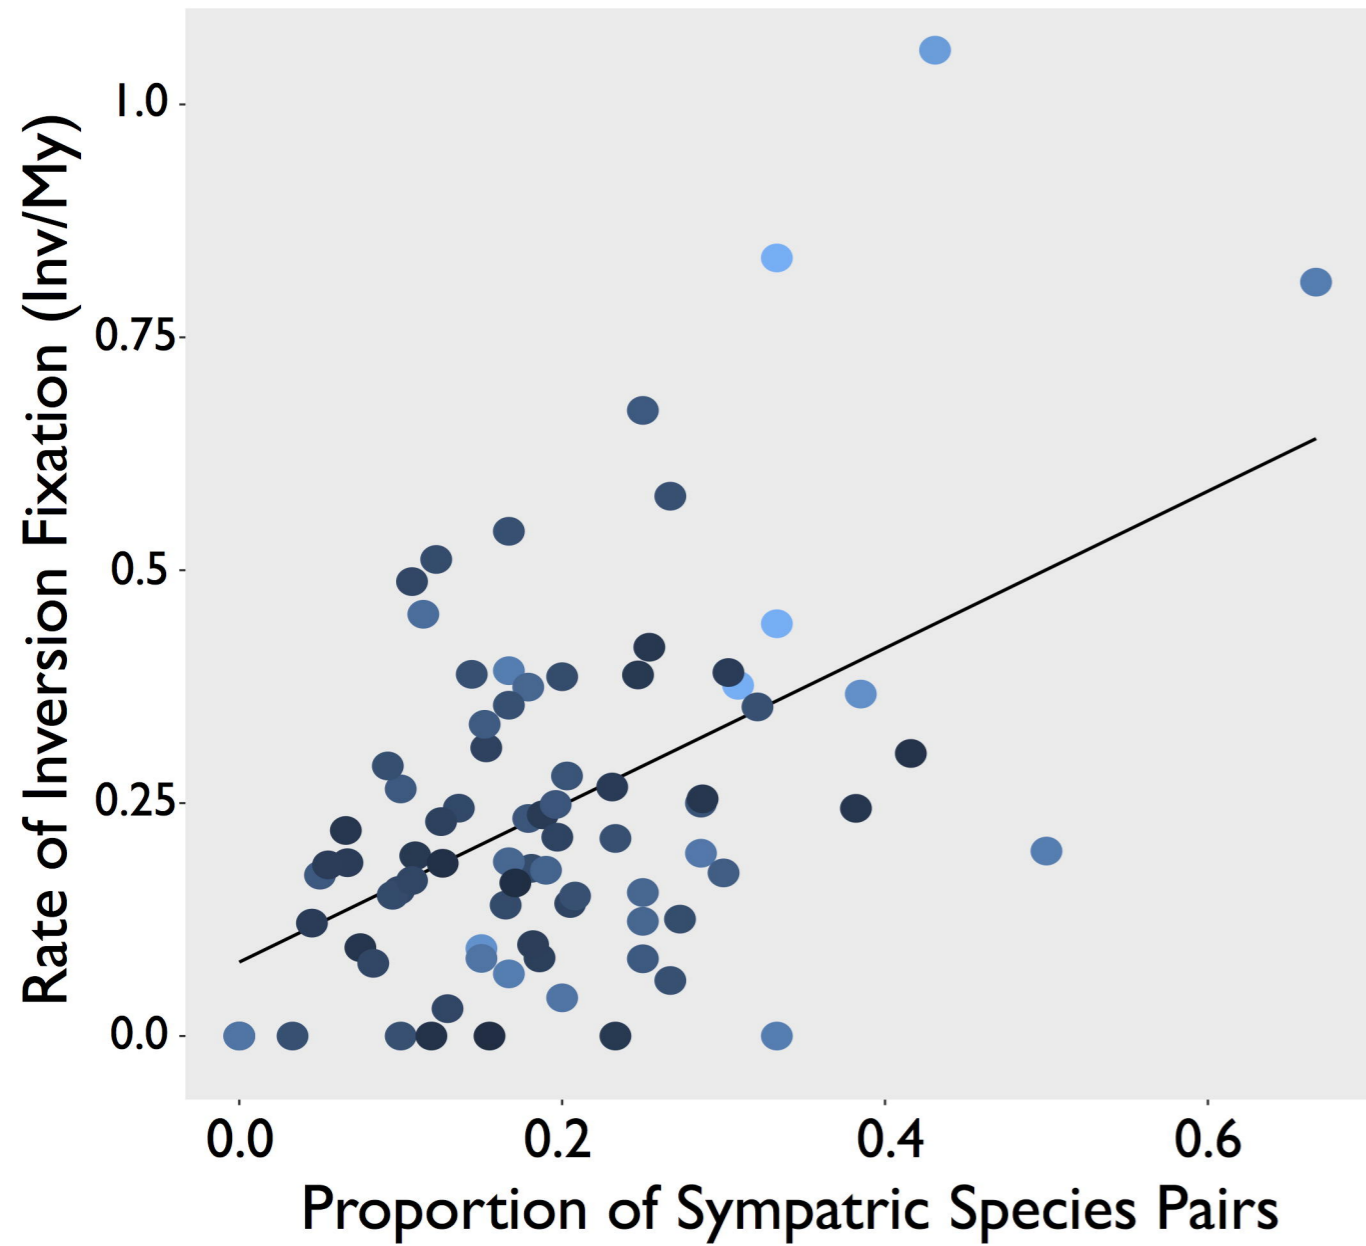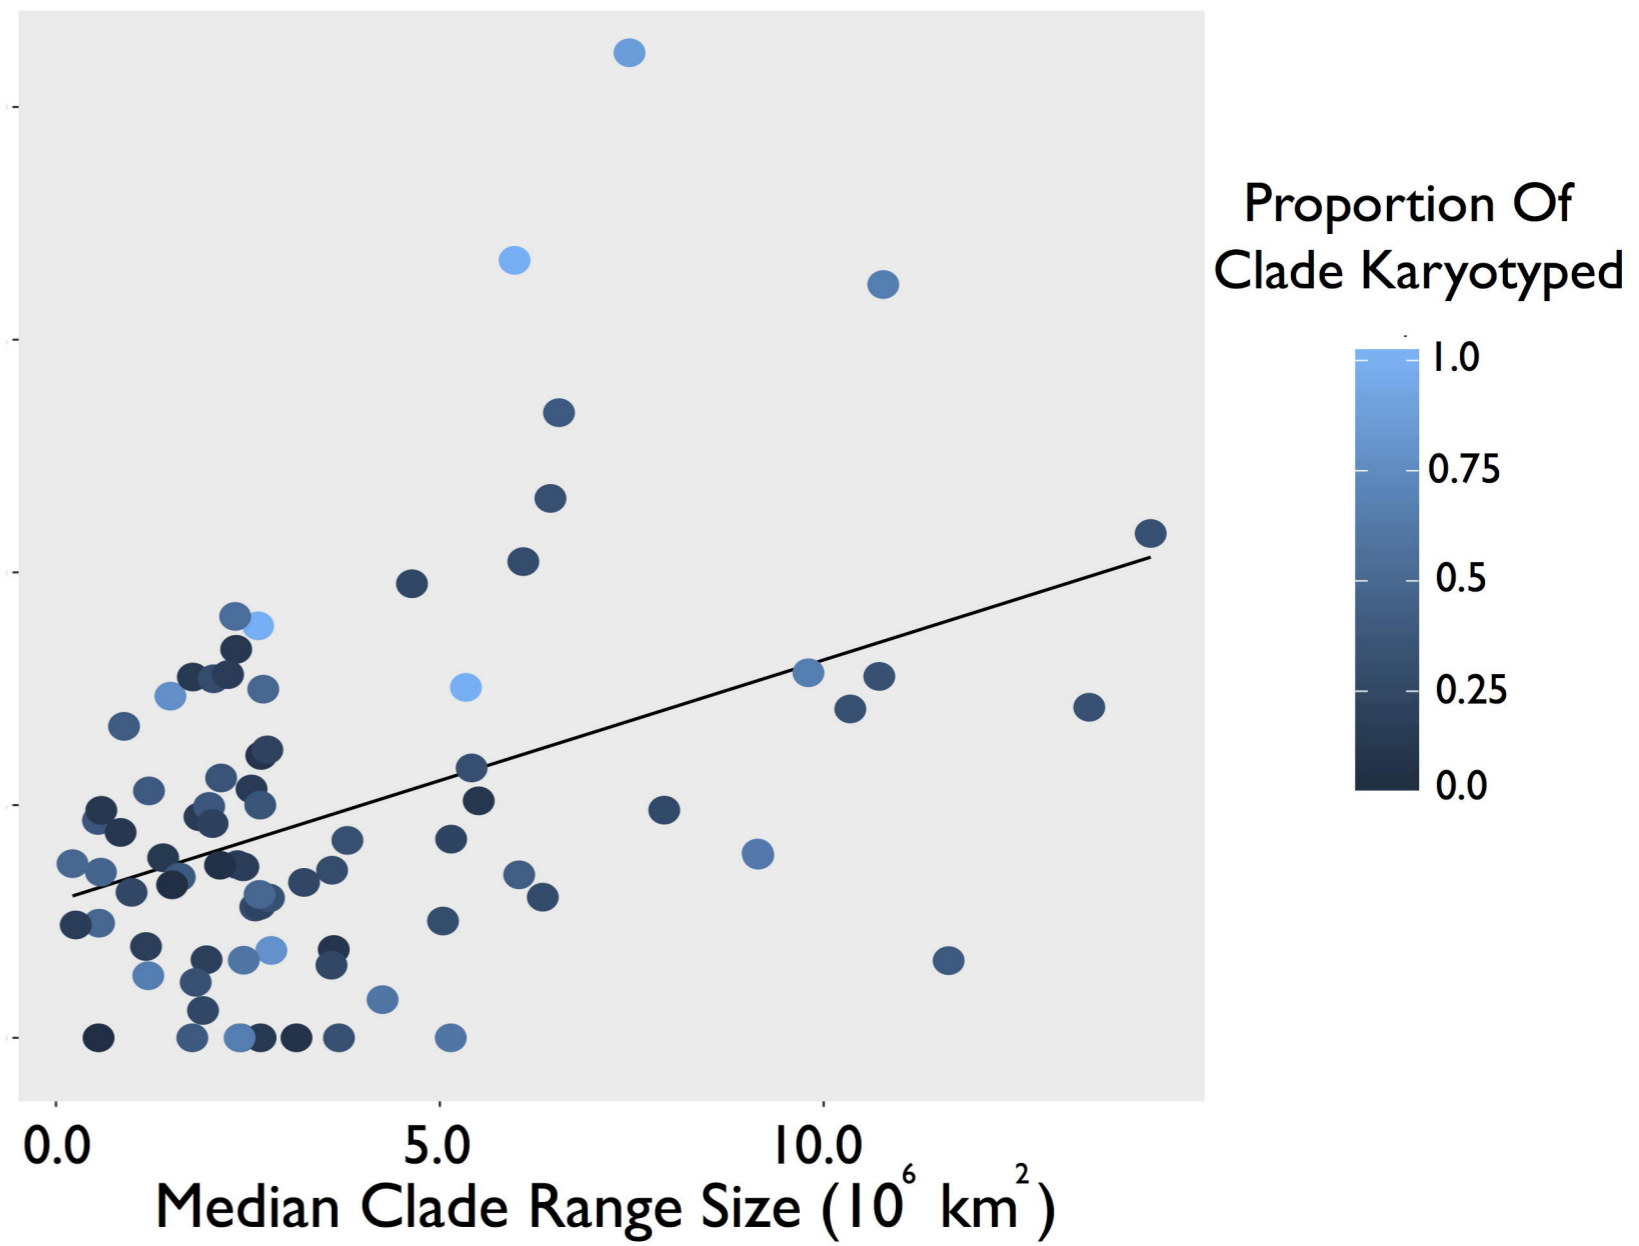

**A**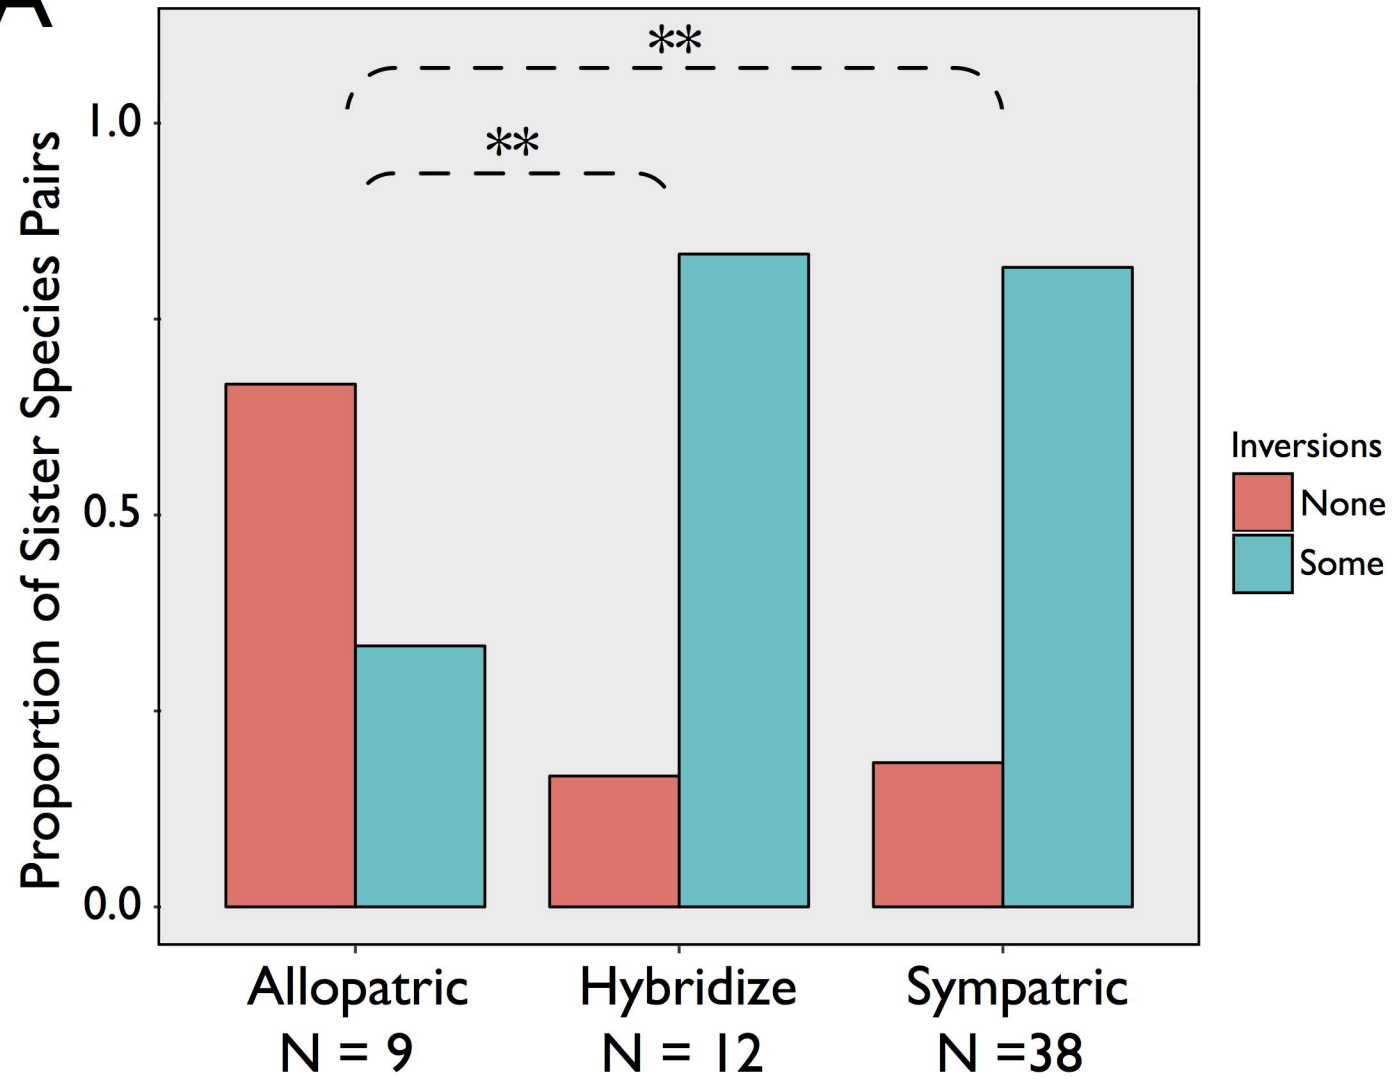**B**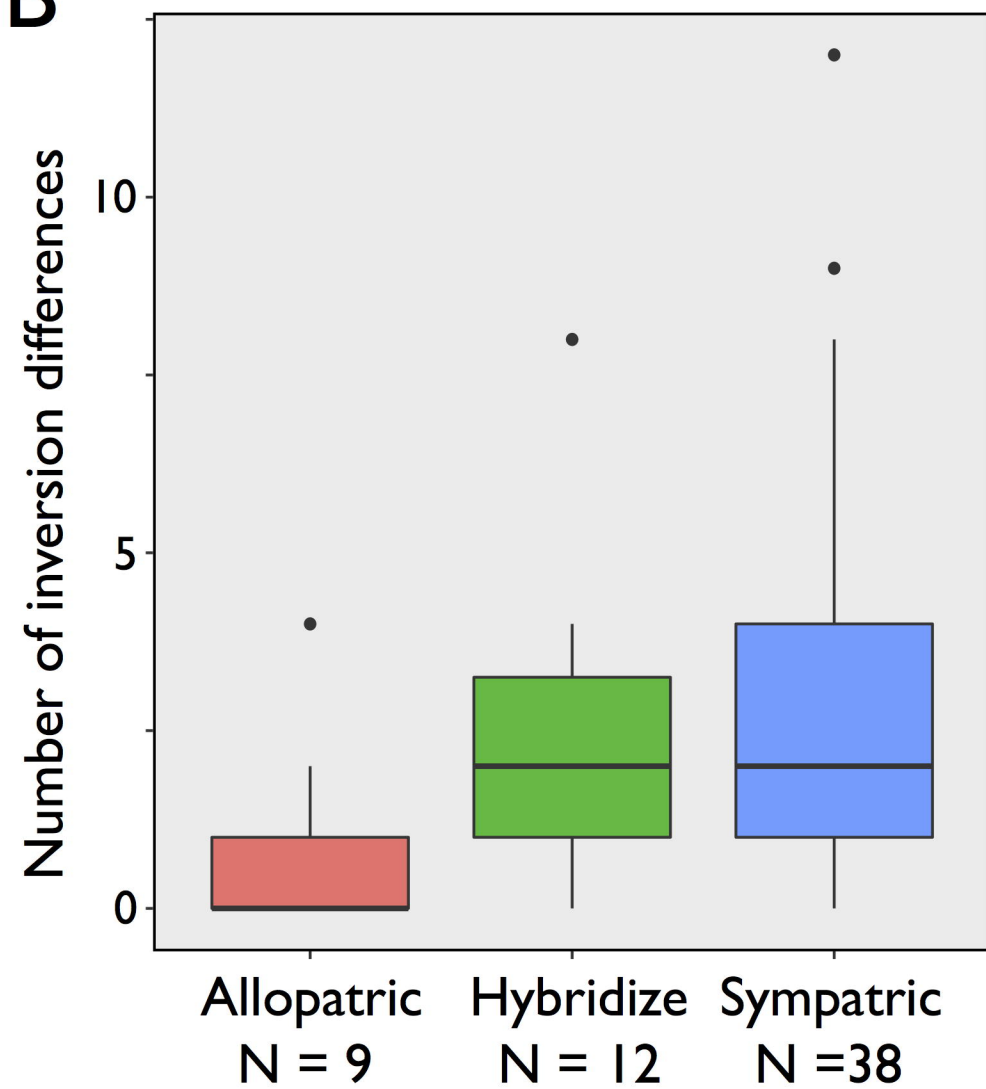

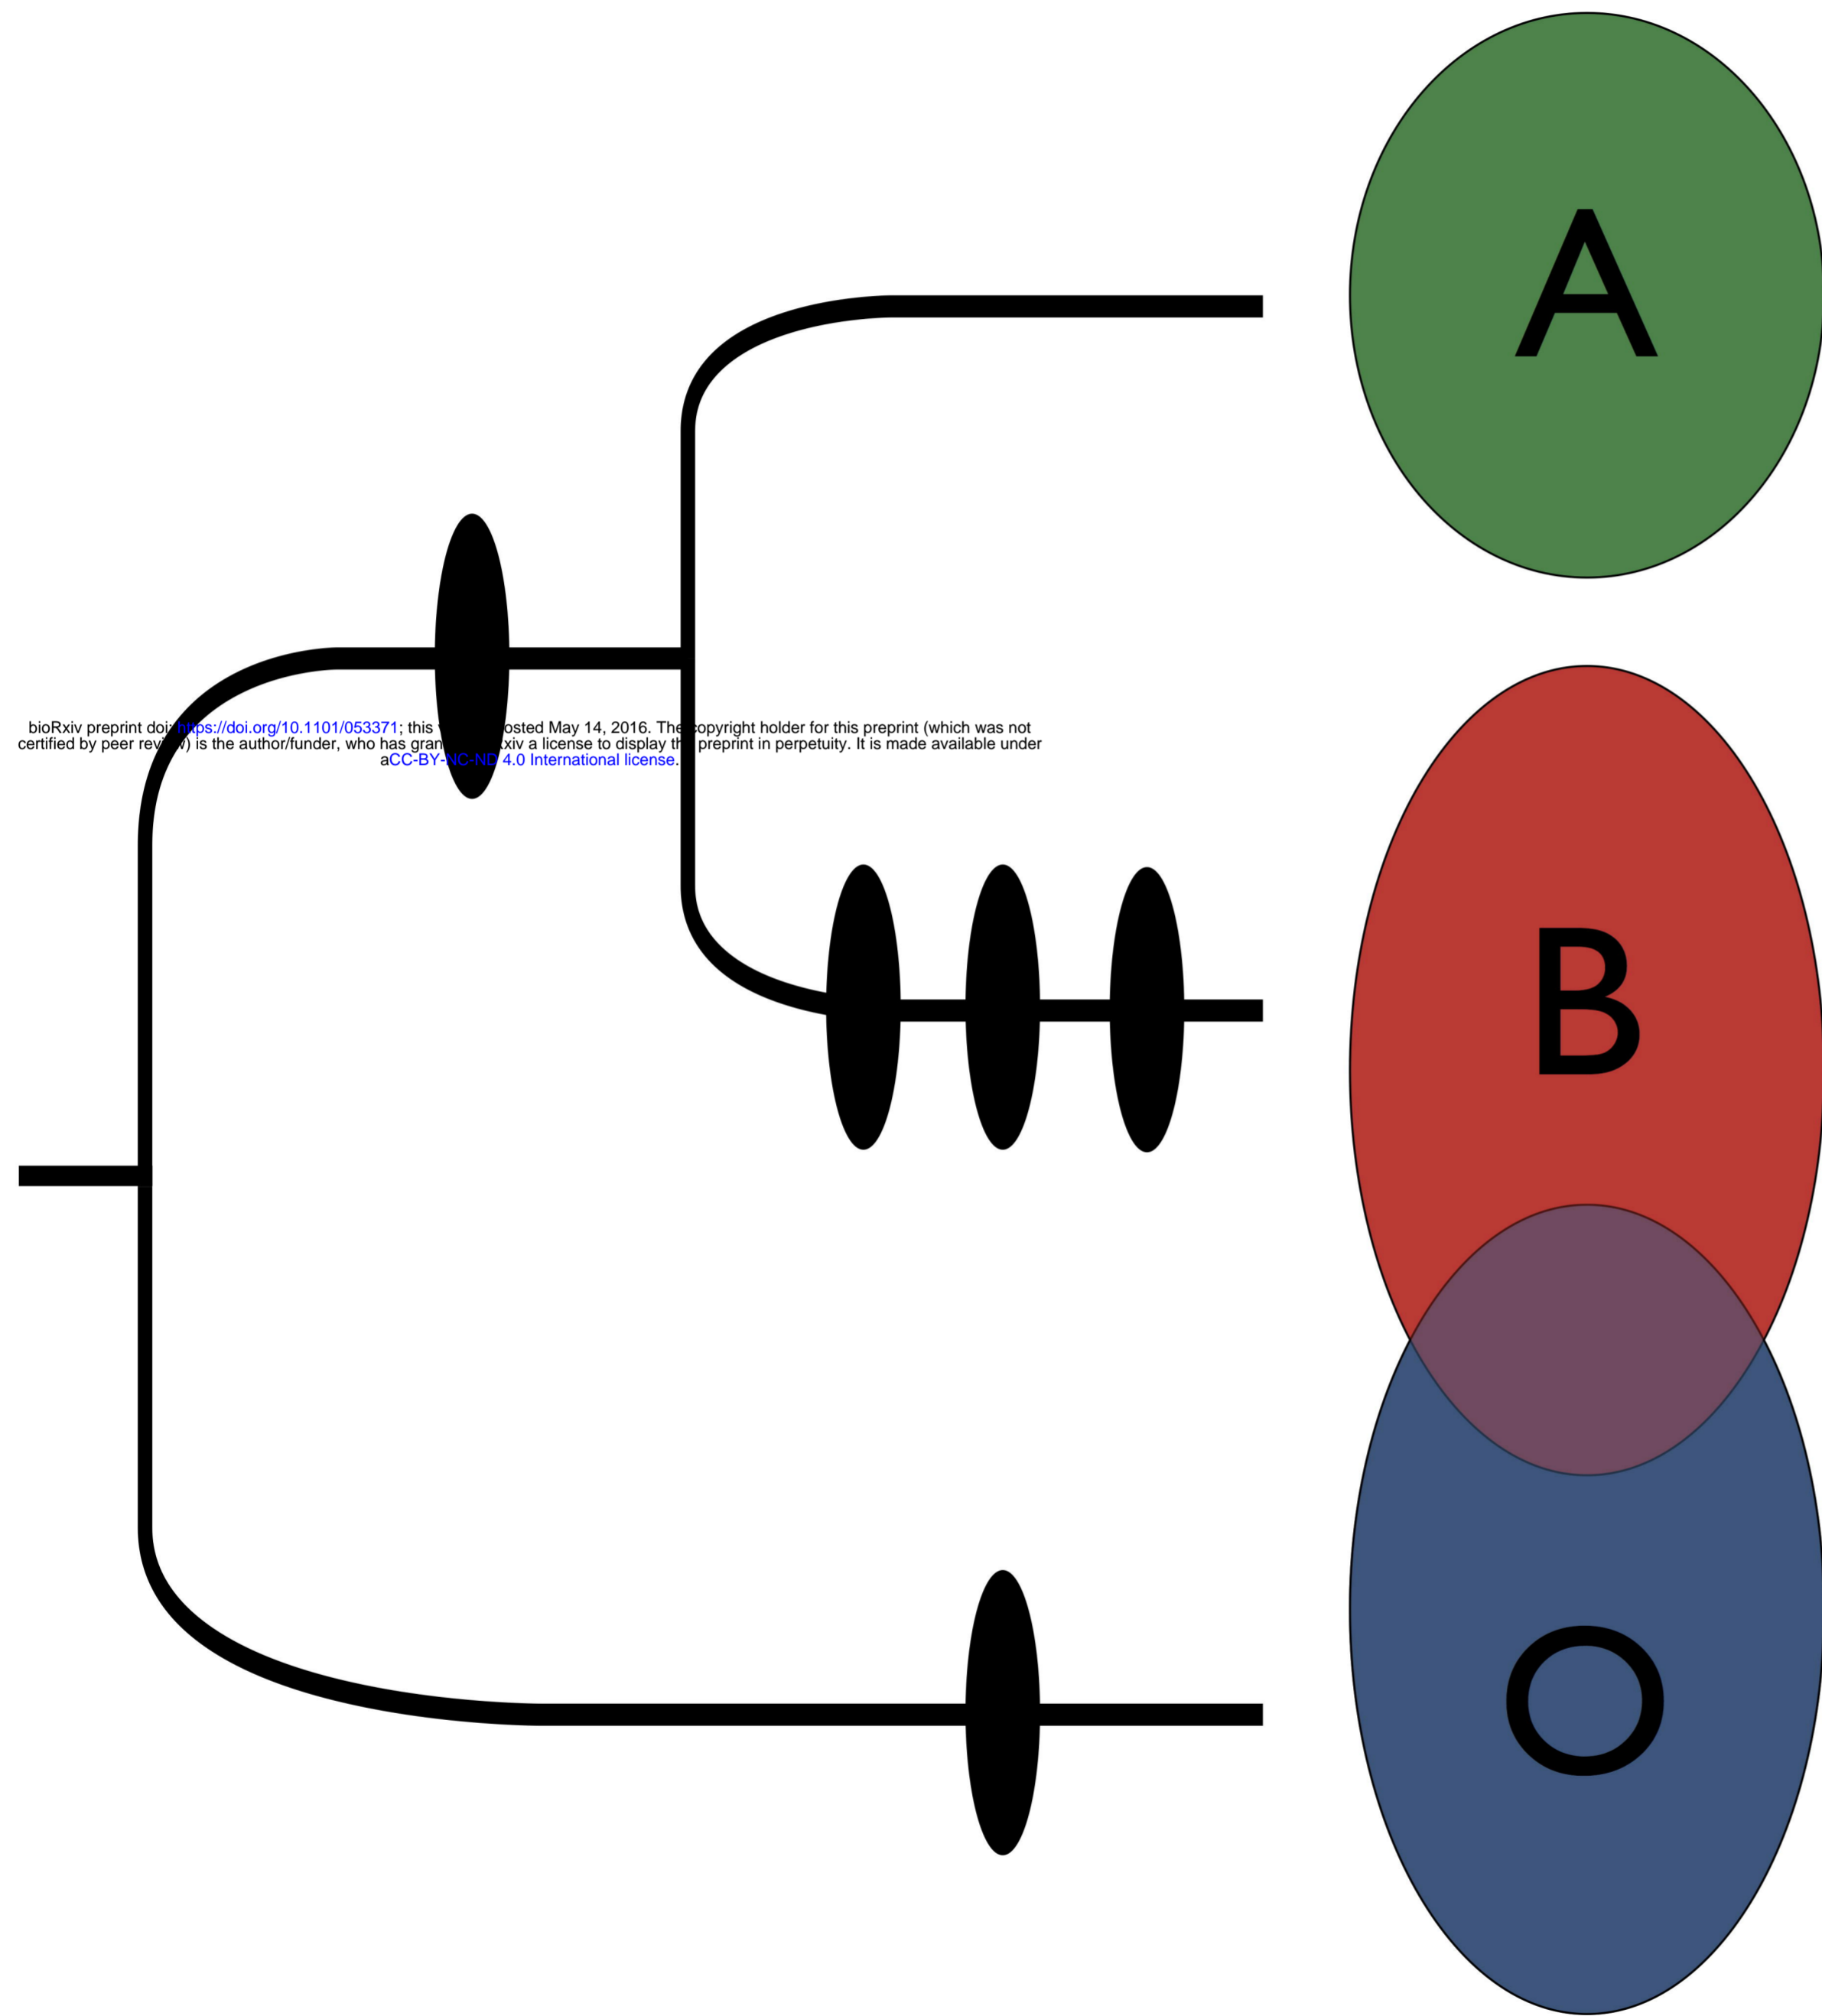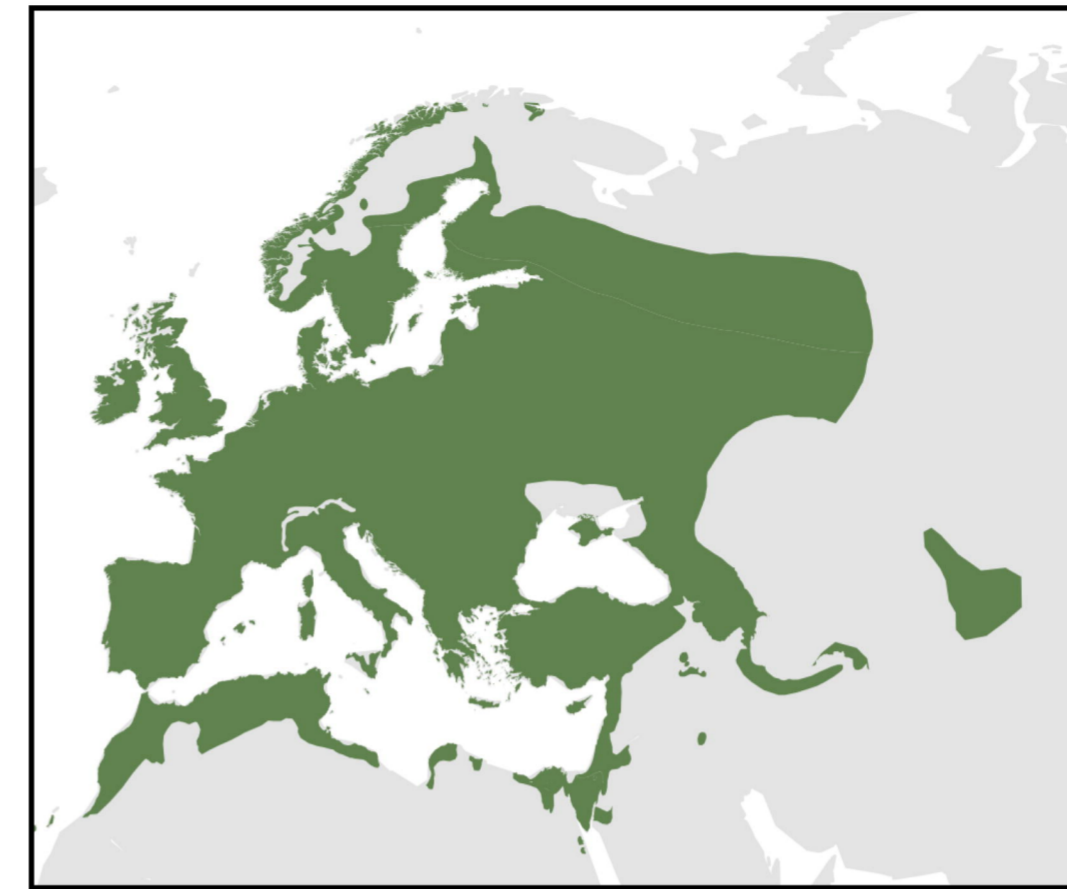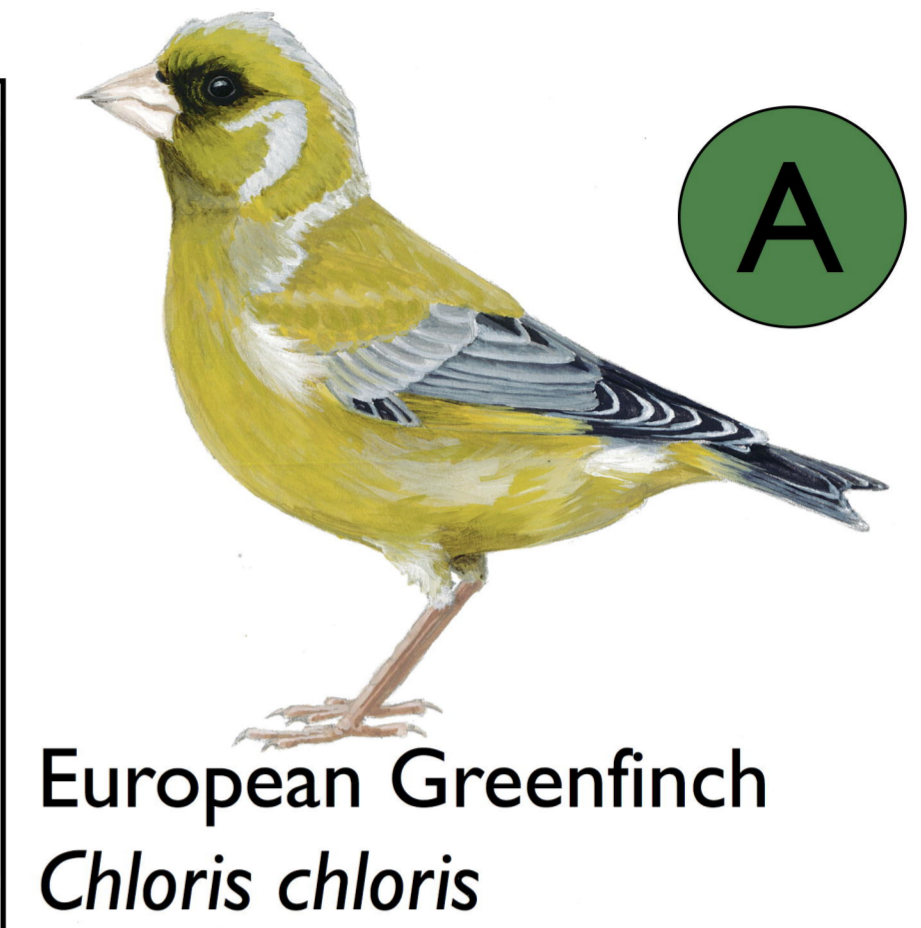

European Greenfinch  
*Chloris chloris*

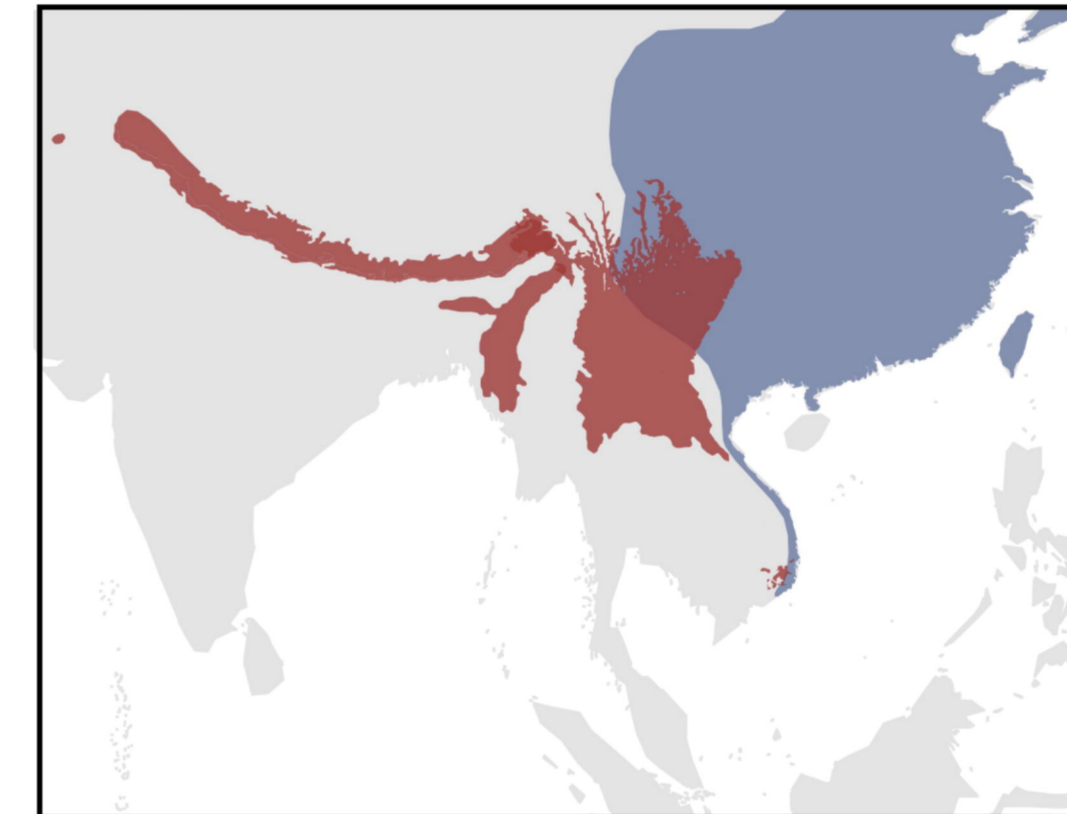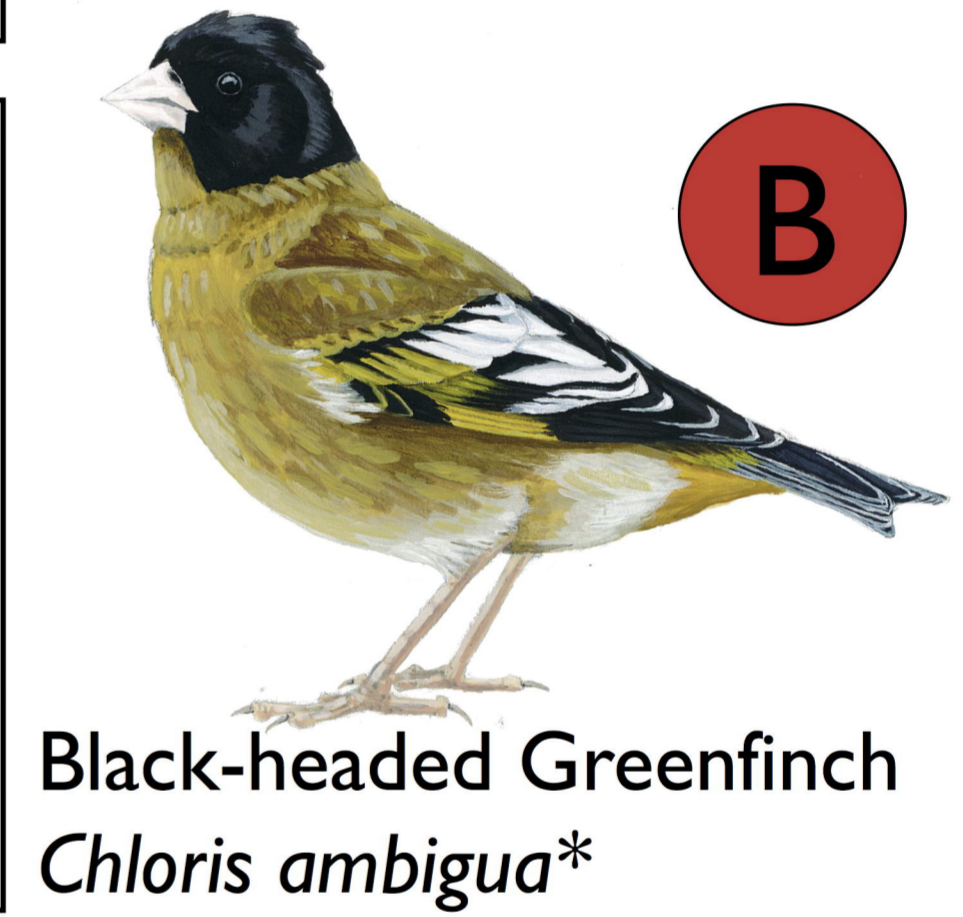

Black-headed Greenfinch  
*Chloris ambigua\**

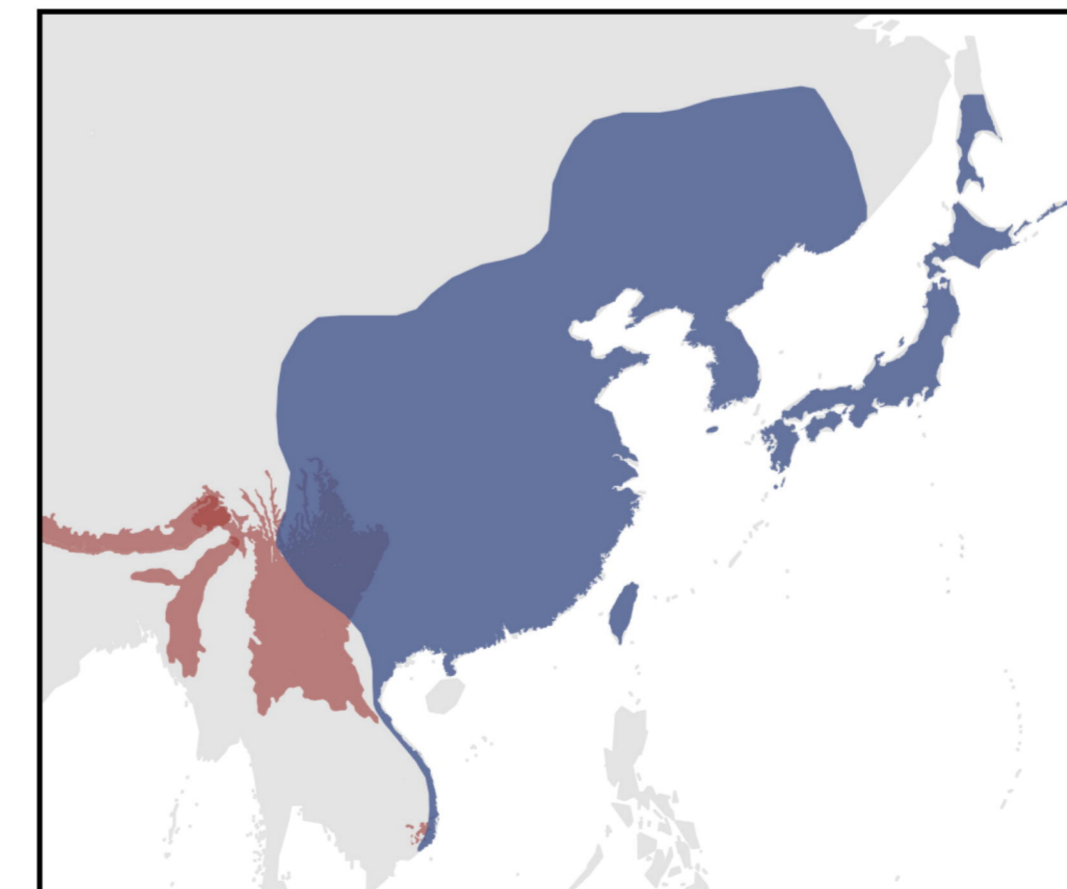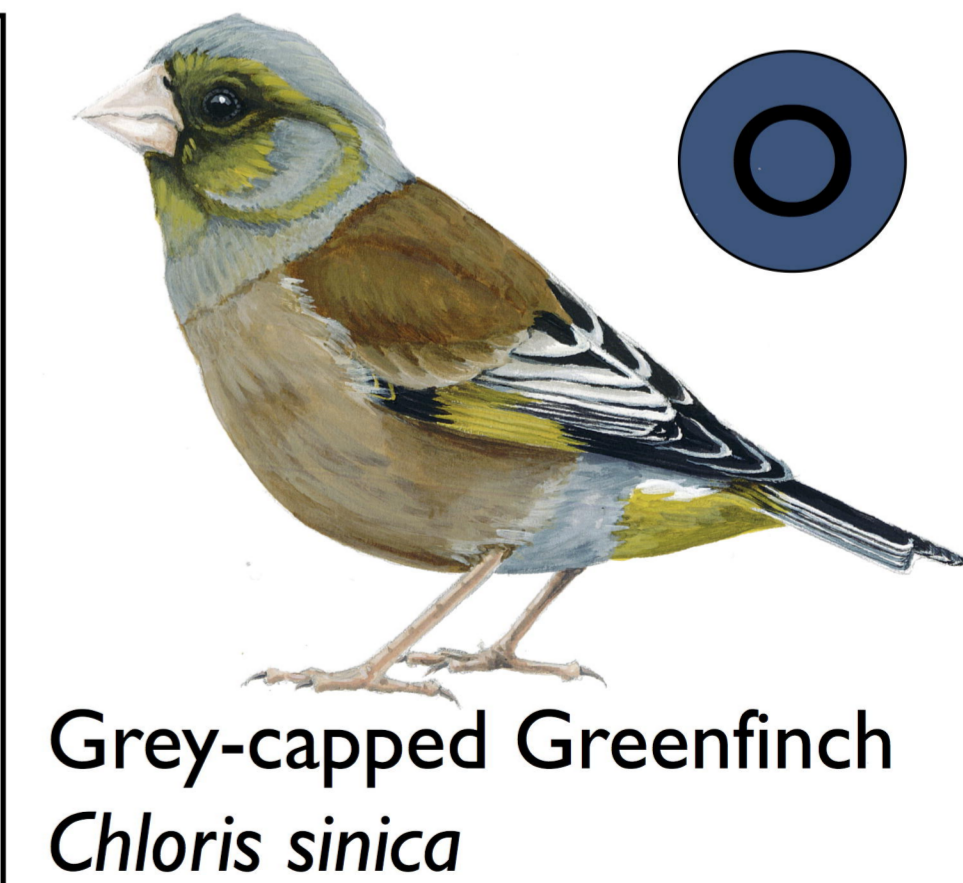

Grey-capped Greenfinch  
*Chloris sinica*

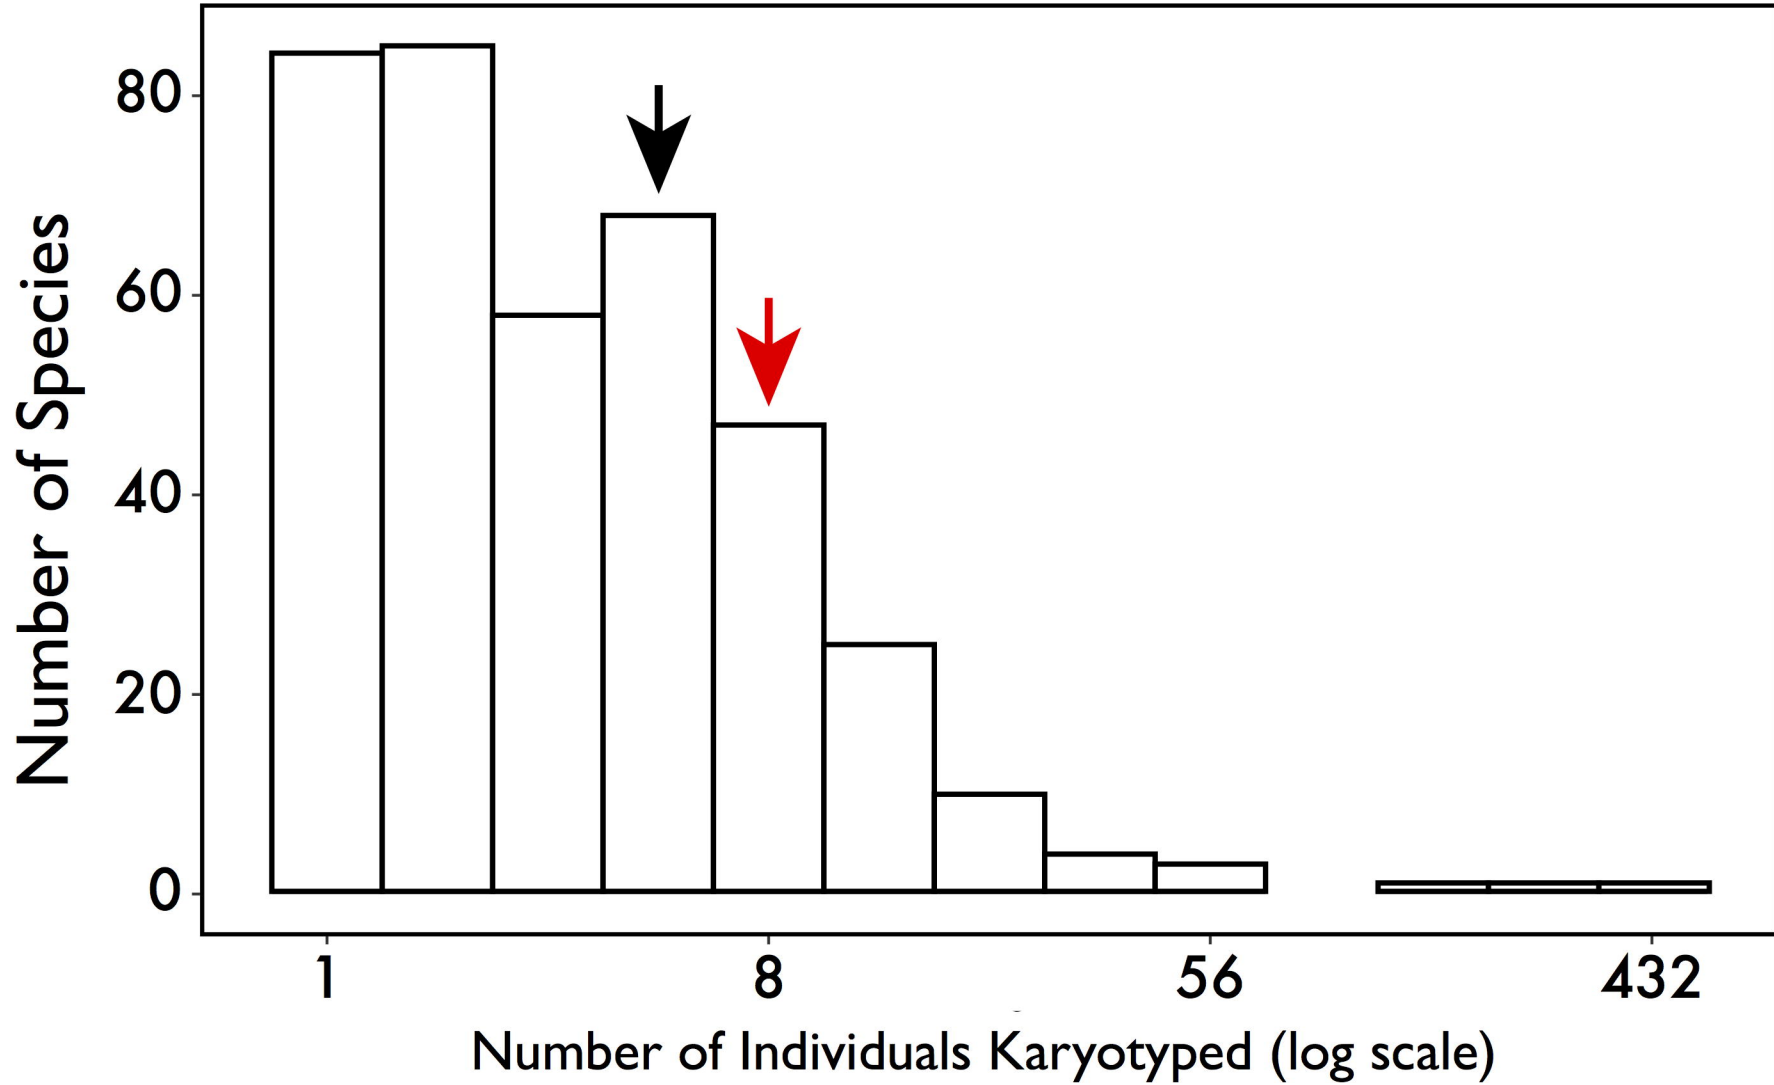

Source: http://www.biorxiv.org/content/10.1101/053371v1.full.pdf
